# Supplementary material for: Copy number of 8q24.3 drives HSF1 expression and patient outcome in cancer: an individual patient data meta-analysis
Source: PubMed Central journal article supplement (PMC6836670; doi:10.1186/s40246-019-0241-3), 2019-11-07
Supplement: 40246_2019_241_MOESM1_ESM.pdf [file 40246_2019_241_MOESM1_ESM.pdf]

## DATA SUPPLEMENT

### Table of contents

|                    |                                                                                                                                                                         |            |
|--------------------|-------------------------------------------------------------------------------------------------------------------------------------------------------------------------|------------|
| <b>Table S1</b>    | Data Collected .....                                                                                                                                                    | Page 2     |
| <b>Table S2</b>    | Descriptive Characteristics of All Individuals (n=9,568) with 8q24.3 Homogenous Copy Number Alteration Information, First Cancer Diagnosis and 5-year Follow-up.....    | Page 3-4   |
| <b>Table S3</b>    | Results of the 2-step Individual Patient Data Meta-Analyses to Assess the Effect of 8q24.3 Copy Number Variants on Prognosis.....                                       | Page 5     |
| <b>Table S4</b>    | Five-year Mortality by 8q24.3 Copy Number Alteration using Diploidy as a Reference .....                                                                                | Page 6     |
| <b>Table S5</b>    | Five-year Mortality of 15 cancer types with Most Cases of 8q24.3 Gain and Amplification using Diploidy as a Reference .....                                             | Page 7     |
| <b>Appendix 1</b>  | Flow chart Illustrating Selection of Individuals for Individual Patient Data Meta-Analysis .....                                                                        | Page 8     |
| <b>Appendix 2</b>  | Overview of HSF1 Expression per Histological Subtype.....                                                                                                               | Page 9     |
| <b>Appendix 3</b>  | Expression of HSF1 in Function of HSF1 Copy Number Alteration per Histological subtype .....                                                                            | Page 10    |
| <b>Appendix 4</b>  | Number of Publication and Description of Selected Cancer-Related Genes per Field Located in 8q24.3 cytoband.....                                                        | Page 11-12 |
| <b>Appendix 5</b>  | Influence of 8q24.3 Copy Number Alteration on Other Cancer-Related Genes Expression Located in 8q24.3 Loci and Comparison with HSF1 Related Expression per Tissue ..... | Page 13-24 |
| <b>Appendix 6.</b> | Simple Linear Regressions of Predicted 8q24.3 Copy Number Alteration Compared to the Expression of Genes Located in 8q24.3 per Tissue .....                             | Page 25    |

Table S1

| Cancer type                                                     | Total number of patient | Morbidity data | Disease Free data | CNA data      | Expression data |
|-----------------------------------------------------------------|-------------------------|----------------|-------------------|---------------|-----------------|
| Hematological, acute myeloid leukemia                           | 191                     | 190            | 187               | 191           | 166             |
| Bladder, urothelial carcinoma                                   | 128                     | 128            | 100               | 122           | 126             |
| Brain, lower grade glioma                                       | 513                     | 510            | 474               | 494           | 513             |
| Breast, invasive ductal carcinoma                               | 862                     | 862            | ..                | 737           | 862             |
| Breast, invasive lobular carcinoma                              | 141                     | 141            | ..                | 127           | 141             |
| Breast, mixed ductal/lobular                                    | 87                      | 87             | ..                | 65            | 87              |
| Head and neck, squamous cell carcinoma                          | 295                     | 293            | 255               | 283           | 292             |
| Colon, adenocarcinoma                                           | 382                     | 381            | 330               | 367           | 240             |
| Skin, melanoma                                                  | 367                     | 357            | 314               | 354           | 367             |
| Stomach, adenocarcinoma diffuse type                            | 72                      | 72             | 58                | 71            | 49              |
| Embryonal carcinoma                                             | 20                      | 20             | 19                | 19            | 20              |
| Uterus, endometrial carcinoma                                   | 23                      | 22             | 21                | 19            | 13              |
| Oesophagus, adenocarcinoma                                      | 87                      | 87             | 65                | 71            | 87              |
| Oesophagus, squamous cell carcinoma                             | 96                      | 96             | 76                | 88            | 95              |
| Thyroid, follicular cancer                                      | 104                     | 104            | 103               | 102           | 104             |
| Brain, glioblastoma multiforme                                  | 577                     | 569            | 417               | 556           | 147             |
| Cervix, squamous cell carcinoma and endocervical adenocarcinoma | 522                     | 519            | 392               | 500           | 514             |
| Breast, invasive carcinoma                                      | 436                     | 243            | ..                | 343           | 173             |
| Kidney, chromophobe                                             | 66                      | 64             | 62                | 65            | 66              |
| Kidney, clear cell carcinoma                                    | 528                     | 526            | 429               | 523           | 525             |
| Kidney, renal papillary cell carcinoma                          | 288                     | 285            | 266               | 287           | 288             |
| Liver, hepatocellular carcinoma                                 | 370                     | 367            | 317               | 347           | 364             |
| Lung, adenocarcinoma                                            | 516                     | 505            | 430               | 481           | 512             |
| Lung, squamous cell carcinoma                                   | 501                     | 493            | 372               | 474           | 498             |
| Hematological/lymphoid, diffuse large B-cell lymphoma           | 48                      | 46             | 42                | 47            | 48              |
| Mesothelioma                                                    | 87                      | 86             | ..                | 83            | 87              |
| Prostate, metastatic cancer                                     | 150                     | ..             | ..                | 117           | 118             |
| Colorectal, mucinous adenocarcinoma                             | 66                      | 66             | 56                | 63            | 23              |
| Prostate, neuroendocrine cancer                                 | 107                     | ..             | ..                | 82            | 46              |
| Testicles, non-seminomatous germ cell tumor                     | 48                      | 48             | 47                | 44            | 48              |
| Ovaries, serous cystadenocarcinoma                              | 579                     | 563            | 481               | 505           | 300             |
| Pancreas, adenocarcinoma                                        | 174                     | 173            | 130               | 168           | 167             |
| Thyroid, papillary cancer                                       | 395                     | 393            | 380               | 394           | 393             |
| Pheochromocytoma                                                | 135                     | 135            | ..                | 129           | 135             |
| Prostate, adenocarcinoma                                        | 492                     | 491            | 485               | 477           | 491             |
| Rectum, adenocarcinoma                                          | 163                     | 161            | 145               | 156           | 91              |
| Testicles, seminoma                                             | 65                      | 65             | 65                | 64            | 65              |
| Soft tissue sarcoma                                             | 248                     | 247            | 218               | 219           | 246             |
| Stomach, adenocarcinoma                                         | 287                     | 280            | 218               | 266           | 258             |
| Thymus, thymoma                                                 | 123                     | 121            | 117               | 123           | 119             |
| Stomach, tubular adenocarcinoma                                 | 79                      | 79             | 61                | 68            | 34              |
| Uterus, carcinosarcoma                                          | 56                      | 56             | 56                | 51            | 56              |
| Uterus, endometrioid carcinoma                                  | 403                     | 402            | 378               | 384           | 105             |
| Uterus, serous carcinoma and papillary serous carcinoma         | 113                     | 113            | 98                | 84            | 58              |
| Eye, uveal melanoma                                             | 79                      | 67             | 59                | 79            | 79              |
| <b>All cancers</b>                                              | <b>11,069</b>           | <b>10,513</b>  | <b>7,723</b>      | <b>10,289</b> | <b>9,216</b>    |

**Table S1. Data Collected from cBioportal.**

Data collected from cBioportal portal which includes peer-reviewed studies, METABRIC data (Molecular Taxonomy of Breast Cancer International Consortium) and unpublished data from The Cancer Genome Atlas (TCGA). The reported numbers represent the number of patients with available data. Abbreviations: CNA : Copy Number Alteration; (..) : Non available

Table S2 (1 of 2)

|                                    | Deep deletion (-2) |     | Shallow deletion (-1) |      | Diploid (reference) |      | Gain (+1) |      | Amplification (+2) |      | Total |
|------------------------------------|--------------------|-----|-----------------------|------|---------------------|------|-----------|------|--------------------|------|-------|
|                                    | N                  | %   | N                     | %    | N                   | %    | N         | %    | N                  | %    | N     |
| <b>Total</b>                       | 12                 | 0.1 | 454                   | 4.7  | 5,174               | 54.1 | 3,082     | 32.2 | 846                | 8.8  | 9,568 |
| <b>Sex</b>                         |                    |     |                       |      |                     |      |           |      |                    |      |       |
| Female                             | 5                  | 0.1 | 246                   | 4.8  | 2,838               | 55.4 | 1,478     | 28.8 | 558                | 10.9 | 5,125 |
| Male                               | 7                  | 0.2 | 204                   | 4.6  | 2,315               | 52.5 | 1,599     | 36.3 | 285                | 6.5  | 4,410 |
| Missing                            | 0                  | 0.0 | 4                     | 12.1 | 21                  | 63.6 | 5         | 15.2 | 3                  | 9.1  | 33    |
| <b>Age, years</b>                  |                    |     |                       |      |                     |      |           |      |                    |      |       |
| <40                                | 2                  | 0.2 | 38                    | 3.9  | 632                 | 64.5 | 252       | 25.7 | 56                 | 5.7  | 980   |
| 40-49                              | 1                  | 0.1 | 54                    | 4.4  | 725                 | 58.6 | 338       | 27.3 | 119                | 9.6  | 1,237 |
| 50-59                              | 3                  | 0.1 | 89                    | 4.1  | 1,214               | 55.4 | 688       | 31.4 | 197                | 9.0  | 2,191 |
| 60-69                              | 4                  | 0.2 | 125                   | 4.9  | 1,34                | 52.1 | 878       | 34.2 | 224                | 8.7  | 2,571 |
| 70-95                              | 2                  | 0.1 | 122                   | 5.4  | 1,13                | 49.8 | 848       | 37.4 | 168                | 7.4  | 2,27  |
| Missing                            | 0                  | 0.0 | 26                    | 8.2  | 133                 | 41.7 | 78        | 24.5 | 82                 | 25.7 | 319   |
| <b>HSF1-expression (quartiles)</b> |                    |     |                       |      |                     |      |           |      |                    |      |       |
| -3.17 to -0.45                     | 9                  | 0.5 | 245                   | 12.5 | 1,481               | 75.4 | 209       | 10.6 | 20                 | 1.0  | 1,964 |
| -0.45 to 0.27                      | 1                  | 0.0 | 82                    | 4.0  | 1,431               | 70.7 | 463       | 22.9 | 48                 | 2.4  | 2,025 |
| 0.27 to 1.39                       | 0                  | 0.0 | 34                    | 1.7  | 1,063               | 53.4 | 780       | 39.2 | 113                | 5.7  | 1,990 |
| 1.39 to 21.06                      | 0                  | 0.0 | 14                    | 0.7  | 325                 | 16.2 | 1,169     | 58.2 | 500                | 24.9 | 2,008 |
| Missing                            | 2                  | 0.1 | 79                    | 5.0  | 874                 | 55.3 | 461       | 29.2 | 165                | 10.4 | 1,581 |
| <b>Tumour stage</b>                |                    |     |                       |      |                     |      |           |      |                    |      |       |
| Stage 0-1 or in situ               | 1                  | 0.1 | 79                    | 4.6  | 1,024               | 59.2 | 550       | 31.8 | 75                 | 4.3  | 1,729 |
| Stage 2                            | 2                  | 0.2 | 46                    | 4.6  | 444                 | 44.2 | 436       | 43.4 | 76                 | 7.6  | 1,004 |
| Stage 3                            | 3                  | 0.2 | 89                    | 6.2  | 556                 | 38.6 | 614       | 42.7 | 177                | 12.3 | 1,439 |
| Stage 4                            | 1                  | 0.2 | 22                    | 3.5  | 265                 | 41.6 | 273       | 42.9 | 76                 | 11.9 | 637   |
| Missing                            | 5                  | 0.1 | 218                   | 4.6  | 2,885               | 60.6 | 1,209     | 25.4 | 442                | 9.3  | 4,759 |
| <b>Year of diagnosis</b>           |                    |     |                       |      |                     |      |           |      |                    |      |       |
| 1978-2005                          | 2                  | 0.1 | 112                   | 6.2  | 923                 | 50.8 | 622       | 34.2 | 159                | 8.7  | 1,818 |
| 2006-2008                          | 2                  | 0.1 | 74                    | 4.9  | 803                 | 52.8 | 529       | 34.8 | 112                | 7.4  | 1,52  |
| 2009-2010                          | 2                  | 0.1 | 69                    | 4.4  | 888                 | 56.2 | 535       | 33.9 | 85                 | 5.4  | 1,579 |
| 2011-2013                          | 5                  | 0.2 | 117                   | 4.3  | 1,511               | 55.8 | 922       | 34.1 | 151                | 5.6  | 2,706 |
| Missing                            | 1                  | 0.1 | 82                    | 4.2  | 1,049               | 53.9 | 474       | 24.4 | 339                | 17.4 | 1,945 |
| <b>5-years outcome</b>             |                    |     |                       |      |                     |      |           |      |                    |      |       |
| Alive and disease free             | 8                  | 0.2 | 193                   | 4.3  | 2,629               | 58.9 | 1,41      | 31.6 | 225                | 5.0  | 4,465 |
| Recurred/Progressed                | 3                  | 0.3 | 56                    | 5.4  | 499                 | 47.8 | 373       | 35.8 | 112                | 10.7 | 1,043 |
| Died                               | 1                  | 0.0 | 153                   | 5.6  | 1,338               | 49.4 | 968       | 35.7 | 249                | 9.2  | 2,709 |
| Recurrence not reported            | 0                  | 0.0 | 52                    | 3.8  | 708                 | 52.4 | 331       | 24.5 | 260                | 19.2 | 1,351 |
| <b>Anatomical location</b>         |                    |     |                       |      |                     |      |           |      |                    |      |       |
| Adrenal glands                     | 0                  | 0.0 | 10                    | 9.2  | 87                  | 79.8 | 11        | 10.1 | 1                  | 0.9  | 109   |
| Bladder                            | 0                  | 0.0 | 4                     | 4.6  | 34                  | 39.1 | 45        | 51.7 | 4                  | 4.6  | 87    |
| Blood                              | 1                  | 0.4 | 2                     | 0.8  | 198                 | 83.2 | 35        | 14.7 | 2                  | 0.8  | 238   |
| Brain                              | 2                  | 0.2 | 54                    | 5.3  | 818                 | 80.2 | 111       | 10.9 | 35                 | 3.4  | 1,020 |
| Breast                             | 0                  | 0.0 | 45                    | 3.5  | 712                 | 56.0 | 258       | 20.3 | 257                | 20.2 | 1,272 |
| Cervix                             | 0                  | 0.0 | 19                    | 6.9  | 145                 | 52.5 | 104       | 37.7 | 8                  | 2.9  | 276   |
| Colorectal                         | 0                  | 0.0 | 18                    | 3.5  | 195                 | 38.0 | 278       | 54.2 | 22                 | 4.3  | 513   |
| Esophagus                          | 0                  | 0.0 | 13                    | 8.2  | 40                  | 25.2 | 82        | 51.6 | 24                 | 15.1 | 159   |
| Eyes                               | 0                  | 0.0 | 0                     | 0.0  | 18                  | 24.0 | 45        | 60.0 | 12                 | 16.0 | 75    |
| Head and Neck                      | 0                  | 0.0 | 4                     | 0.9  | 130                 | 27.8 | 292       | 62.4 | 42                 | 9.0  | 468   |
| Kidney                             | 0                  | 0.0 | 57                    | 7.7  | 573                 | 77.6 | 105       | 14.2 | 3                  | 0.4  | 738   |
| Liver                              | 0                  | 0.0 | 17                    | 5.4  | 100                 | 31.9 | 141       | 45.0 | 55                 | 17.6 | 313   |
| Lung                               | 0                  | 0.0 | 45                    | 5.5  | 266                 | 32.8 | 450       | 55.5 | 50                 | 6.2  | 811   |
| Mesenchyme                         | 0                  | 0.0 | 28                    | 15.1 | 102                 | 55.1 | 50        | 27.0 | 5                  | 2.7  | 185   |
| Mesothelium                        | 0                  | 0.0 | 4                     | 5.3  | 55                  | 73.3 | 16        | 21.3 | 0                  | 0.0  | 75    |
| Ovaries                            | 2                  | 0.4 | 36                    | 7.2  | 81                  | 16.1 | 205       | 40.8 | 179                | 35.6 | 503   |
| Pancreas                           | 1                  | 0.6 | 4                     | 2.6  | 93                  | 60.4 | 42        | 27.3 | 14                 | 9.1  | 154   |
| Prostate                           | 3                  | 0.5 | 20                    | 3.1  | 373                 | 57.7 | 183       | 28.3 | 68                 | 10.5 | 647   |
| Skin                               | 0                  | 0.0 | 22                    | 6.6  | 141                 | 42.1 | 150       | 44.8 | 22                 | 6.6  | 335   |
| Stomach                            | 0                  | 0.0 | 17                    | 4.3  | 138                 | 34.8 | 222       | 55.9 | 20                 | 5.0  | 397   |
| Testicles                          | 0                  | 0.0 | 6                     | 4.8  | 24                  | 19.2 | 94        | 75.2 | 1                  | 0.8  | 125   |
| Thymus                             | 0                  | 0.0 | 2                     | 1.8  | 101                 | 89.4 | 9         | 8.0  | 1                  | 0.9  | 113   |
| Thyroid                            | 2                  | 0.4 | 4                     | 0.9  | 452                 | 97.4 | 6         | 1.3  | 0                  | 0.0  | 464   |
| Uterus                             | 1                  | 0.2 | 23                    | 4.7  | 298                 | 60.7 | 148       | 30.1 | 21                 | 4.3  | 491   |

Table S2. Descriptive Characteristics of All Individuals (n=9,568) with homogenous 8q24.3 Copy Number Alteration Information, First Cancer Diagnosis and Five-year Follow-Up.

Table S2 (1 of 2)

Brusselaers et al.

|                                                                 | Deep deletion (-2) |     | Shallow deletion (-1) |      | Diploid (reference) |      | Gain (+1) |      | Amplification (+2) |      | Total |
|-----------------------------------------------------------------|--------------------|-----|-----------------------|------|---------------------|------|-----------|------|--------------------|------|-------|
|                                                                 | N                  | %   | N                     | %    | N                   | %    | N         | %    | N                  | %    |       |
| <b>Total</b>                                                    | 12                 | 0.1 | 454                   | 4.7  | 5,174               | 54.1 | 3,082     | 32.2 | 846                | 8.8  | 9,568 |
| <b>Histological subtype</b>                                     |                    |     |                       |      |                     |      |           |      |                    |      |       |
| Bladder, urothelial carcinoma                                   | 0                  | 0.0 | 4                     | 4.6  | 34                  | 39.1 | 45        | 51.7 | 4                  | 4.6  | 87    |
| Brain, glioblastoma multiforme                                  | 0                  | 0.0 | 39                    | 7.2  | 441                 | 81.7 | 55        | 10.2 | 5                  | 0.9  | 540   |
| Brain, lower grade glioma                                       | 2                  | 0.4 | 15                    | 3.1  | 377                 | 78.5 | 56        | 11.7 | 30                 | 6.3  | 480   |
| Breast, invasive carcinoma                                      | 0                  | 0.0 | 14                    | 4.1  | 202                 | 58.9 | 70        | 20.4 | 57                 | 16.6 | 343   |
| Breast, invasive ductal carcinoma                               | 0                  | 0.0 | 22                    | 3.0  | 374                 | 50.7 | 160       | 21.7 | 181                | 24.6 | 737   |
| Breast, invasive lobular carcinoma                              | 0                  | 0.0 | 5                     | 3.9  | 94                  | 74.0 | 20        | 15.7 | 8                  | 6.3  | 127   |
| Breast, mixed ductal/lobular                                    | 0                  | 0.0 | 4                     | 6.2  | 42                  | 64.6 | 8         | 12.3 | 11                 | 16.9 | 65    |
| Cervix, squamous cell carcinoma and endocervical adenocarcinoma | 0                  | 0.0 | 19                    | 6.9  | 145                 | 52.5 | 104       | 37.7 | 8                  | 2.9  | 276   |
| Colon, adenocarcinoma                                           | 0                  | 0.0 | 8                     | 2.5  | 113                 | 36.0 | 181       | 57.6 | 12                 | 3.8  | 314   |
| Colorectal, mucinous adenocarcinoma                             | 0                  | 0.0 | 4                     | 7.0  | 32                  | 56.1 | 19        | 33.3 | 2                  | 3.5  | 57    |
| Embryonal carcinoma                                             | 0                  | 0.0 | 1                     | 5.3  | 2                   | 10.5 | 16        | 84.2 | 0                  | 0.0  | 19    |
| Esophagus, adenocarcinoma                                       | 0                  | 0.0 | 8                     | 11.3 | 24                  | 33.8 | 31        | 43.7 | 8                  | 11.3 | 71    |
| Esophagus, squamous cell carcinoma                              | 0                  | 0.0 | 5                     | 5.7  | 16                  | 18.2 | 51        | 58.0 | 16                 | 18.2 | 88    |
| Eye, uveal melanoma                                             | 0                  | 0.0 | 0                     | 0.0  | 18                  | 24.0 | 45        | 60.0 | 12                 | 16.0 | 75    |
| Head and neck, squamous cell carcinoma                          | 0                  | 0.0 | 4                     | 0.9  | 130                 | 27.8 | 292       | 62.4 | 42                 | 9.0  | 468   |
| Haematological, acute myeloid leukaemia                         | 0                  | 0.0 | 0                     | 0.0  | 167                 | 87.4 | 23        | 12.0 | 1                  | 0.5  | 191   |
| Haematological/lymphoid, diffuse large B-cell lymphoma          | 1                  | 2.1 | 2                     | 4.3  | 31                  | 66.0 | 12        | 25.5 | 1                  | 2.1  | 47    |
| Kidney, chromophobe renal cell carcinoma                        | 0                  | 0.0 | 8                     | 13.8 | 35                  | 60.3 | 14        | 24.1 | 1                  | 1.7  | 58    |
| Kidney, clear cell carcinoma                                    | 0                  | 0.0 | 43                    | 9.6  | 337                 | 75.4 | 65        | 14.5 | 2                  | 0.4  | 447   |
| Kidney, renal papillary cell carcinoma                          | 0                  | 0.0 | 6                     | 2.6  | 201                 | 86.3 | 26        | 11.2 | 0                  | 0.0  | 233   |
| Liver, hepatocellular carcinoma                                 | 0                  | 0.0 | 17                    | 5.4  | 100                 | 31.9 | 141       | 45.0 | 55                 | 17.6 | 313   |
| Lung, adenocarcinoma                                            | 0                  | 0.0 | 25                    | 6.3  | 151                 | 37.8 | 205       | 51.2 | 19                 | 4.8  | 400   |
| Lung, squamous cell carcinoma                                   | 0                  | 0.0 | 20                    | 4.9  | 115                 | 28.0 | 245       | 59.6 | 31                 | 7.5  | 411   |
| Mesothelioma                                                    | 0                  | 0.0 | 4                     | 5.3  | 55                  | 73.3 | 16        | 21.3 | 0                  | 0.0  | 75    |
| Ovaries, serous cystadenocarcinoma                              | 2                  | 0.4 | 36                    | 7.2  | 81                  | 16.1 | 205       | 40.8 | 179                | 35.6 | 503   |
| Pancreas, adenocarcinoma                                        | 1                  | 0.6 | 4                     | 2.6  | 93                  | 60.4 | 42        | 27.3 | 14                 | 9.1  | 154   |
| Pheochromocytoma                                                | 0                  | 0.0 | 10                    | 9.2  | 87                  | 79.8 | 11        | 10.1 | 1                  | 0.9  | 109   |
| Prostate, adenocarcinoma                                        | 3                  | 0.7 | 8                     | 1.8  | 316                 | 70.5 | 99        | 22.1 | 22                 | 4.9  | 448   |
| Prostate, metastatic cancer                                     | 0                  | 0.0 | 5                     | 4.3  | 38                  | 32.5 | 65        | 55.6 | 9                  | 7.7  | 117   |
| Prostate, neuroendocrine cancer                                 | 0                  | 0.0 | 7                     | 8.5  | 19                  | 23.2 | 19        | 23.2 | 37                 | 45.1 | 82    |
| Rectum, adenocarcinoma                                          | 0                  | 0.0 | 6                     | 4.2  | 50                  | 35.2 | 78        | 54.9 | 8                  | 5.6  | 142   |
| Skin, melanoma                                                  | 0                  | 0.0 | 22                    | 6.6  | 141                 | 42.1 | 150       | 44.8 | 22                 | 6.6  | 335   |
| Soft tissue sarcoma                                             | 0                  | 0.0 | 28                    | 15.1 | 102                 | 55.1 | 50        | 27.0 | 5                  | 2.7  | 185   |
| Stomach, adenocarcinoma                                         | 0                  | 0.0 | 11                    | 4.2  | 92                  | 35.2 | 146       | 55.9 | 12                 | 4.6  | 261   |
| Stomach, adenocarcinoma diffuse type                            | 0                  | 0.0 | 2                     | 2.9  | 30                  | 43.5 | 35        | 50.7 | 2                  | 2.9  | 69    |
| Stomach, tubular adenocarcinoma                                 | 0                  | 0.0 | 4                     | 6.0  | 16                  | 23.9 | 41        | 61.2 | 6                  | 9.0  | 67    |
| Testicles, non-seminomatous germ cell tumor                     | 0                  | 0.0 | 3                     | 7.1  | 13                  | 31.0 | 26        | 61.9 | 0                  | 0.0  | 42    |
| Testicles, seminoma                                             | 0                  | 0.0 | 2                     | 3.1  | 9                   | 14.1 | 52        | 81.3 | 1                  | 1.6  | 64    |
| Thymus, thymoma                                                 | 0                  | 0.0 | 2                     | 1.8  | 101                 | 89.4 | 9         | 8.0  | 1                  | 0.9  | 113   |
| Thyroid, follicular cancer                                      | 2                  | 2.0 | 2                     | 2.0  | 92                  | 93.9 | 2         | 2.0  | 0                  | 0.0  | 98    |
| Thyroid, papillary cancer                                       | 0                  | 0.0 | 2                     | 0.5  | 360                 | 98.4 | 4         | 1.1  | 0                  | 0.0  | 366   |
| Uterus, carcinosarcoma                                          | 0                  | 0.0 | 7                     | 15.6 | 8                   | 17.8 | 24        | 53.3 | 6                  | 13.3 | 45    |
| Uterus, endometrial carcinoma                                   | 0                  | 0.0 | 0                     | 0.0  | 10                  | 58.8 | 5         | 29.4 | 2                  | 11.8 | 17    |
| Uterus, endometrioid carcinoma                                  | 1                  | 0.3 | 3                     | 0.8  | 260                 | 72.8 | 86        | 24.1 | 7                  | 2.0  | 357   |
| Uterus, serous carcinoma and papillary serous carcinoma         | 0                  | 0.0 | 13                    | 18.1 | 20                  | 27.8 | 33        | 45.8 | 6                  | 8.3  | 72    |

Table S2. Descriptive Characteristics of All Individuals (n=9,568) with homogenous 8q24.3 Copy Number Alteration Information, First Cancer Diagnosis and Five-year Follow-Up.

|                                     | Weighted by anatomical location |               | Weighted by histological subtype |               | Weighted by study |               |
|-------------------------------------|---------------------------------|---------------|----------------------------------|---------------|-------------------|---------------|
|                                     | OR [95% CI]                     | I-squared (%) | OR (95% CI)                      | I-squared (%) | OR (95% CI)       | I-squared (%) |
| <b>5-year mortality</b>             |                                 |               |                                  |               |                   |               |
| Diploidy                            | 1.00 (reference)                | -             | 1.00 (reference)                 | -             | 1.00 (reference)  | -             |
| Shallow or deep deletion (-1 or -2) | 1.40 [1.07-1.84]                | 19.3          | 1.32 [1.04-1.67]                 | 0.0           | 1.32 [1.03-1.69]  | 4.5           |
| Gain (+1)                           | 1.32 [1.07-1.62]                | 57.7          | 1.31 [1.10-1.56]                 | 34.7          | 1.36 [1.15-1.60]  | 32.6          |
| Amplification (+2)                  | 1.22 [0.89-1.68]                | 44.0          | 1.22 [1.00-1.49]                 | 0.0           | 1.23 [1.01-1.51]  | 0.0           |
| Gain (+1) or amplification (+2)     | 1.30 [1.05-1.60]                | 62.4          | 1.29 [1.10-1.52]                 | 0.0           | 1.33 [1.14-1.55]  | 29.8          |
| Deletion or gain/amplification      | 1.27 [1.06-1.52]                | 54.9          | 1.26 [1.09-1.45]                 | 26.8          | 1.29 [1.12-1.49]  | 25.9          |
| <b>5-year healthy survival</b>      |                                 |               |                                  |               |                   |               |
| Diploidy                            | 1.00 (reference)                | -             | 1.00 (reference)                 | -             | 1.00 (reference)  | -             |
| Shallow or deep deletion (-1 or -2) | 0.73 [0.53-1.02]                | 38.7          | 0.78 [0.61-1.01]                 | 4.9           | 0.77 [0.59-0.99]  | 7.6           |
| Gain (+1)                           | 0.78 [0.64-0.95]                | 56.4          | 0.78 [0.66-0.93]                 | 36.5          | 0.76 [0.64-0.90]  | 37.0          |
| Amplification (+2)                  | 0.77 [0.57-1.05]                | 32.3          | 0.77 [0.61-0.96]                 | 0.0           | 0.76 [0.61-0.96]  | 0.0           |
| Gain (+1) or amplification (+2)     | 0.79 [0.64-0.97]                | 62.9          | 0.78 [0.66-0.92]                 | 37.2          | 0.76 [0.64-0.90]  | 39.0          |
| Deletion or gain/amplification      | 0.80 [0.66-0.97]                | 61.1          | 0.79 [0.68-0.92]                 | 32.1          | 0.77 [0.66-0.90]  | 37.5          |

**Table S3. Results of the 2-step Individual Patient Data Meta-Analyses to Assess the Effect of 8q24.3 Copy Number Alterations on Prognosis.**

Analysis were weighted by anatomical location, histological subtype or study, and presented as odds ratio's (OR) and 95% confidence intervals (CI).

Table S4

| Cancer type                                                     | Total       |              |             | Model 1<br>(n=9,568)      |                          | Model 2<br>(n=7,593)      |                         |
|-----------------------------------------------------------------|-------------|--------------|-------------|---------------------------|--------------------------|---------------------------|-------------------------|
|                                                                 | %<br>died   | %<br>diploid | n           | Deletion                  | Gain/amplification       | Deletion                  | Gain/amplification      |
| Bladder, urothelial carcinoma                                   | 44.8        | 39.1         | 87          |                           | 0.84 [0.35-2.03]         |                           |                         |
| Brain, glioblastoma multiforme                                  | 79.6        | 81.7         | 540         | 0.98 [0.44-2.21]          | 0.91 [0.47-1.76]         | 0.98 [0.93-1.03]          | 1.01 [0.87-1.17]        |
| Brain, lower grade glioma                                       | 19.6        | 78.5         | 480         | 1.68 [0.57-4.91]          | 0.78 [0.42-1.46]         |                           |                         |
| Breast, invasive carcinoma                                      | 8.2         | 58.9         | 343         |                           | 1.21 [0.55-2.66]         |                           |                         |
| Breast, invasive ductal carcinoma                               | 22.8        | 50.7         | 737         | 1.34 [0.51-3.52]          | 1.09 [0.77-1.55]         |                           |                         |
| Breast, invasive lobular carcinoma                              | 22.8        | 74.0         | 127         |                           | 0.95 [0.34-2.64]         |                           |                         |
| Breast, mixed ductal/lobular                                    | 18.5        | 64.6         | 65          |                           | 2.14 [0.56-8.17]         |                           |                         |
| Cervix, squamous cell carcinoma and endocervical adenocarcinoma | 19.9        | 52.5         | 276         | 0.78 [0.21-2.88]          | 1.14 [0.62-2.10]         |                           |                         |
| Colon, adenocarcinoma                                           | 19.4        | 36.0         | 314         |                           | 1.38 [0.75-2.55]         |                           | 1.59 [0.90-2.79]        |
| Colorectal, mucinous adenocarcinoma                             | 19.3        | 56.1         | 57          |                           | 0.60 [0.14-2.62]         |                           | 1.42 [0.23-8.95]        |
| Embryonal carcinoma                                             | 5.3         | 10.5         | 19          |                           |                          |                           |                         |
| Esophagus, adenocarcinoma                                       | 42.3        | 33.8         | 71          |                           | 2.83 [0.96-8.36]         |                           |                         |
| Esophagus, squamous cell carcinoma                              | 35.2        | 18.2         | 88          |                           | 0.59 [0.19-1.79]         |                           |                         |
| <b>Eye, uveal melanoma</b>                                      | <b>26.7</b> | <b>24.0</b>  | <b>75</b>   |                           | <b>8.50 [1.05-68.76]</b> |                           |                         |
| Head and neck, squamous cell carcinoma                          | 39.1        | 27.8         | 468         |                           | 1.44 [0.94-2.21]         |                           | 1.53 [0.94-2.48]        |
| Hematological, acute myeloid leukemia                           | 66.0        | 87.4         | 191         |                           | 1.64 [0.62-4.35]         |                           |                         |
| Hematological/lymphoid, diffuse large B-cell lymphoma           | 17.0        | 66.0         | 47          |                           | 0.76 [0.13-4.36]         |                           |                         |
| <b>Kidney, chromophobe renal cell carcinoma</b>                 | <b>8.6</b>  | <b>60.3</b>  | <b>58</b>   |                           | <b>1.52 [0.88-2.63]</b>  |                           | <b>1.38 [1.26-1.52]</b> |
| <b>Kidney, clear cell carcinoma</b>                             | <b>29.3</b> | <b>75.4</b>  | <b>447</b>  | <b>1.55 [0.17-13.84]</b>  | <b>4.84 [1.96-11.92]</b> |                           |                         |
| Kidney, renal papillary cell carcinoma                          | 14.6        | 86.3         | 233         |                           |                          |                           |                         |
| Liver, hepatocellular carcinoma                                 | 32.6        | 31.9         | 313         | 1.49 [0.52-4.26]          | 1.01 [0.60-1.69]         |                           |                         |
| Lung, adenocarcinoma                                            | 32.3        | 37.8         | 400         | 1.85 [0.77-4.45]          | 1.51 [0.96-2.38]         | 2.02 [0.50-8.17]          | 1.51 [0.65-3.47]        |
| <b>Lung, squamous cell carcinoma</b>                            | <b>35.0</b> | <b>28.0</b>  | <b>411</b>  | <b>1.11 [0.39-3.14]</b>   | <b>1.62 [1.01-2.60]</b>  | <b>1.79 [1.21-2.66]</b>   | <b>1.92 [1.42-2.60]</b> |
| Mesothelioma                                                    | 81.3        | 73.3         | 75          |                           | 1.08 [0.26-4.48]         |                           |                         |
| <b>Ovaries, serous cystadenocarcinoma</b>                       | <b>47.5</b> | <b>16.1</b>  | <b>503</b>  | <b>1.81 [0.83-3.94]</b>   | <b>1.18 [0.73-1.92]</b>  | <b>1.83 [1.39-2.41]</b>   | <b>1.44 [1.41-1.47]</b> |
| Pancreas, adenocarcinoma                                        | 55.8        | 60.4         | 154         |                           | 1.83 [0.92-3.63]         |                           |                         |
| Pheochromocytoma                                                | 1.8         | 79.8         | 109         |                           | 7.82 [0.46-134.08]       |                           |                         |
| <b>Prostate, adenocarcinoma</b>                                 | <b>1.3</b>  | <b>70.5</b>  | <b>448</b>  | <b>10.43 [1.00-109.3]</b> | <b>1.75 [0.29-10.63]</b> | <b>24.75 [0.88-765.6]</b> | <b>1.92 [1.61-2.30]</b> |
| Prostate, metastatic cancer                                     | 0.0         | 32.5         | 117         |                           |                          |                           |                         |
| Prostate, neuroendocrine cancer                                 | 0.0         | 23.3         | 82          |                           |                          |                           |                         |
| <b>Rectum, adenocarcinoma</b>                                   | <b>17.6</b> | <b>35.2</b>  | <b>142</b>  |                           | <b>3.04 [0.97-9.58]</b>  |                           | <b>2.43 [1.05-5.62]</b> |
| Skin, melanoma                                                  | 31.6        | 42.1         | 335         | 1.22 [0.48-3.11]          | 0.95 [0.59-1.54]         |                           |                         |
| <b>Soft tissue sarcoma</b>                                      | <b>33.5</b> | <b>55.1</b>  | <b>185</b>  | <b>1.47 [0.60-3.56]</b>   | <b>2.05 [1.03-4.07]</b>  |                           |                         |
| Stomach, adenocarcinoma                                         | 34.9        | 35.2         | 261         | 0.53 [0.13-2.14]          | 0.66 [0.39-1.12]         |                           |                         |
| Stomach, adenocarcinoma diffuse type                            | 39.1        | 43.5         | 69          |                           | 0.91 [0.34-2.45]         |                           | 1.05 [0.09-11.81]       |
| <b>Stomach, tubular adenocarcinoma</b>                          | <b>38.8</b> | <b>23.9</b>  | <b>67</b>   |                           | <b>0.23 [0.07-0.76]</b>  |                           | <b>0.21 [0.11-0.42]</b> |
| Testicles, non-seminomatous germ cell tumor                     | 2.4         | 31.0         | 42          |                           |                          |                           |                         |
| Testicles, seminoma                                             | 0.0         | 14.1         | 64          |                           |                          |                           |                         |
| Thymus, thymoma                                                 | 5.3         | 89.4         | 113         |                           | 2.13 [0.22-20.30]        |                           |                         |
| Thyroid, follicular cancer                                      | 1.0         | 93.9         | 98          |                           |                          |                           |                         |
| Thyroid, papillary cancer                                       | 2.7         | 98.4         | 366         |                           |                          |                           |                         |
| Uterus, carcinosarcoma                                          | 60.0        | 17.8         | 45          |                           |                          |                           |                         |
| Uterus, endometrial carcinoma                                   | 17.7        | 29.4         | 17          |                           |                          |                           |                         |
| <b>Uterus, endometrioid carcinoma</b>                           | <b>10.9</b> | <b>72.8</b>  | <b>357</b>  |                           | <b>2.68 [1.34-5.38]</b>  |                           | <b>3.63 [2.93-4.50]</b> |
| Uterus, serous carcinoma and papillary serous carcinoma         | 27.8        | 27.8         | 72          | 0.90 [0.17-4.64]          | 1.33 [0.39-4.51]         | 0.85 [0.45-1.58]          | 1.23 [0.32-4.67]        |
| <b>Total</b>                                                    | <b>28.3</b> | <b>54.1</b>  | <b>9,57</b> | <b>1.42 [1.16-1.73]</b>   | <b>1.29 [1.17-1.41]</b>  | <b>1.37 [0.88-2.15]</b>   | <b>1.32 [0.78-2.25]</b> |

Model 1 is unadjusted for any confounders, Model 2 is adjusted for age, sex, calendar period and clustering by study.

**Table S4. Five-year Mortality by Copy Number Alteration using 8q24.3 Diploidy as a Reference.**

Table is categorised by histological subtypes of cancer, and expressed as odds ratios (OR) and 95% confidence intervals (CI).

| 15 cancer types with most cases of +1 and +2 8q24.3 copy number combined | Model 1                  |                          | Model 2                 |                          |
|--------------------------------------------------------------------------|--------------------------|--------------------------|-------------------------|--------------------------|
|                                                                          | Gain (+1)                | Amplification (+2)       | Gain (+1)               | Amplification (+2)       |
| Brain, lower grade glioma                                                | 0.67 [0.30-1.48]         | 1.01 [0.40-2.55]         |                         |                          |
| Breast, invasive carcinoma                                               | 1.50 [0.61-3.67]         | 0.88 [0.28-2.74]         |                         |                          |
| Breast, invasive ductal carcinoma                                        | 0.93 [0.59-1.46]         | 1.25 [0.83-1.89]         |                         |                          |
| Cervix, squamous cell carcinoma and endocervical adenocarcinoma          | 1.25 [0.68-2.32]         |                          |                         |                          |
| <b>Colon, adenocarcinoma</b>                                             | <b>1.36 [0.73-2.52]</b>  | <b>1.76 [0.43-7.14]</b>  | <b>1.58 [1.01-2.46]</b> | <b>1.57 [0.19-12.81]</b> |
| <b>Head and neck, squamous cell carcinoma</b>                            | <b>1.35 [0.88-2.09]</b>  | <b>2.23 [1.10-4.51]</b>  | <b>1.40 [0.75-2.62]</b> | <b>2.68 [2.17-3.30]</b>  |
| Liver, hepatocellular carcinoma                                          | 0.90 [0.52-1.57]         | 1.31 [0.66-2.61]         |                         |                          |
| Lung, adenocarcinoma                                                     | 1.57 [0.99-2.48]         | 0.99 [0.34-2.93]         | 1.57 [0.67-3.66]        | 0.92 [0.46-1.85]         |
| <b>Lung, squamous cell carcinoma</b>                                     | <b>1.79 [1.11-2.89]</b>  | <b>0.62 [0.23-1.66]</b>  | <b>2.07 [1.42-3.01]</b> | <b>0.88 [0.29-2.70]</b>  |
| <b>Ovaries, serous cystadenocarcinoma</b>                                | <b>1.35 [0.81-2.27]</b>  | <b>1.01 [0.60-1.72]</b>  | <b>1.53 [1.15-2.05]</b> | <b>1.33 [0.91-1.93]</b>  |
| <b>Prostate, adenocarcinoma</b>                                          | <b>1.06 [0.11-10.35]</b> | <b>4.97 [0.50-49.85]</b> | <b>1.12 [0.76-1.64]</b> | <b>4.41 [3.41-5.71]</b>  |
| <b>Rectum, adenocarcinoma</b>                                            | <b>3.45 [1.09-10.89]</b> |                          | <b>2.85 [1.20-6.75]</b> |                          |
| Skin, melanoma                                                           | 0.91 [0.56-1.50]         | 1.22 [0.48-3.11]         |                         |                          |
| Stomach, adenocarcinoma                                                  | 0.65 [0.38-1.12]         | 0.71 [0.20-2.53]         |                         |                          |
| <b>Uterus, endometrioid carcinoma</b>                                    | <b>2.74 [1.35-5.57]</b>  | <b>2.00 [0.23-17.44]</b> | <b>3.69 [3.46-3.93]</b> | <b>1.97 [0.11-34.35]</b> |

Model 1 is unadjusted for any confounders, Model 2 is adjusted for age, sex, calendar period and clustering by study.

**Table S5. Five-year Mortality of 15 cancer types with Most Cases of 8q24.3 Gain and Amplification using Diploidy as a Reference.**

The risk of five-year mortality by copy number alterations, categorised by histological subtypes of cancer, and expressed as odds ratios (OR) and 95% confidence intervals (CI).

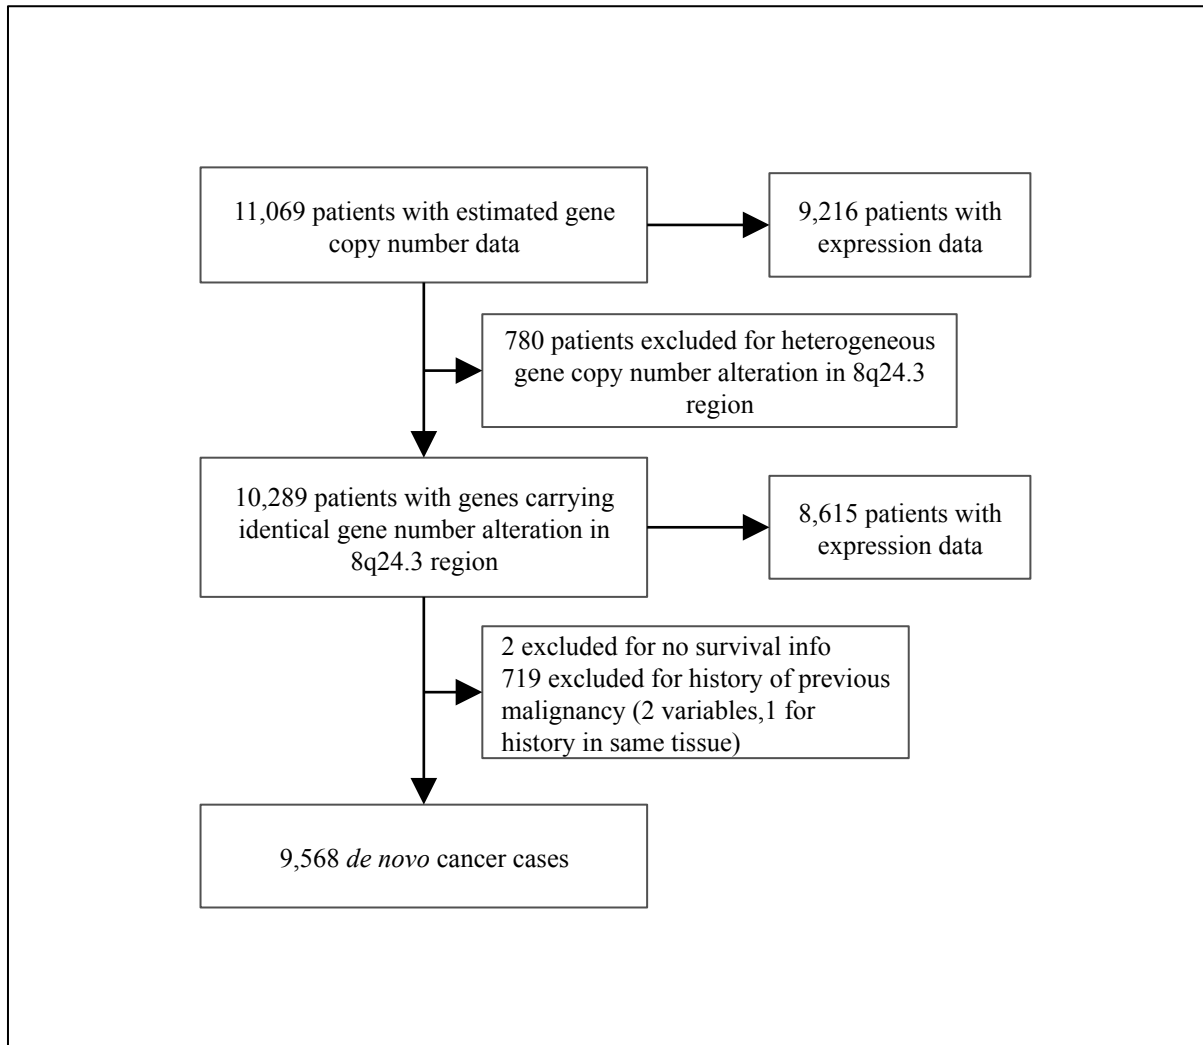

**Appendix 1. Flow Chart Illustrating Selection of Individuals for Individual Patient Data Meta-Analysis.**



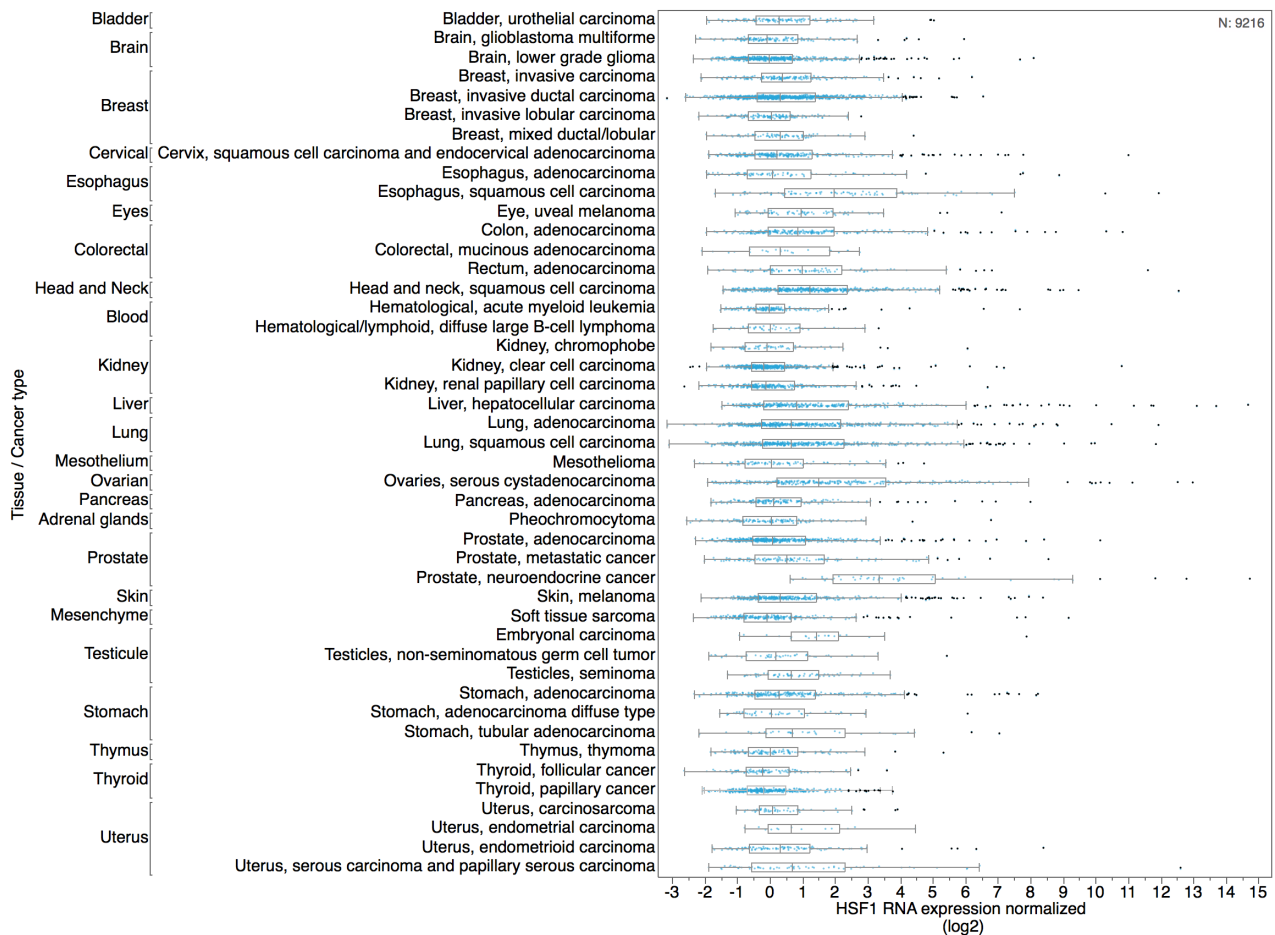

**Appendix 2. Overview of HSF1 RNA Expression per Histological Subtype.**

Normalised mRNA expression data of HSF1 (Z-scores 2) are represented in blue dots. Box plots show additionally the median values at centred lines; box limits indicate the 25<sup>th</sup> and 75<sup>th</sup> percentiles; whiskers extend 1.5 times the interquartile range from the 25<sup>th</sup> and 75<sup>th</sup> percentiles; outliers are represented in black dots.

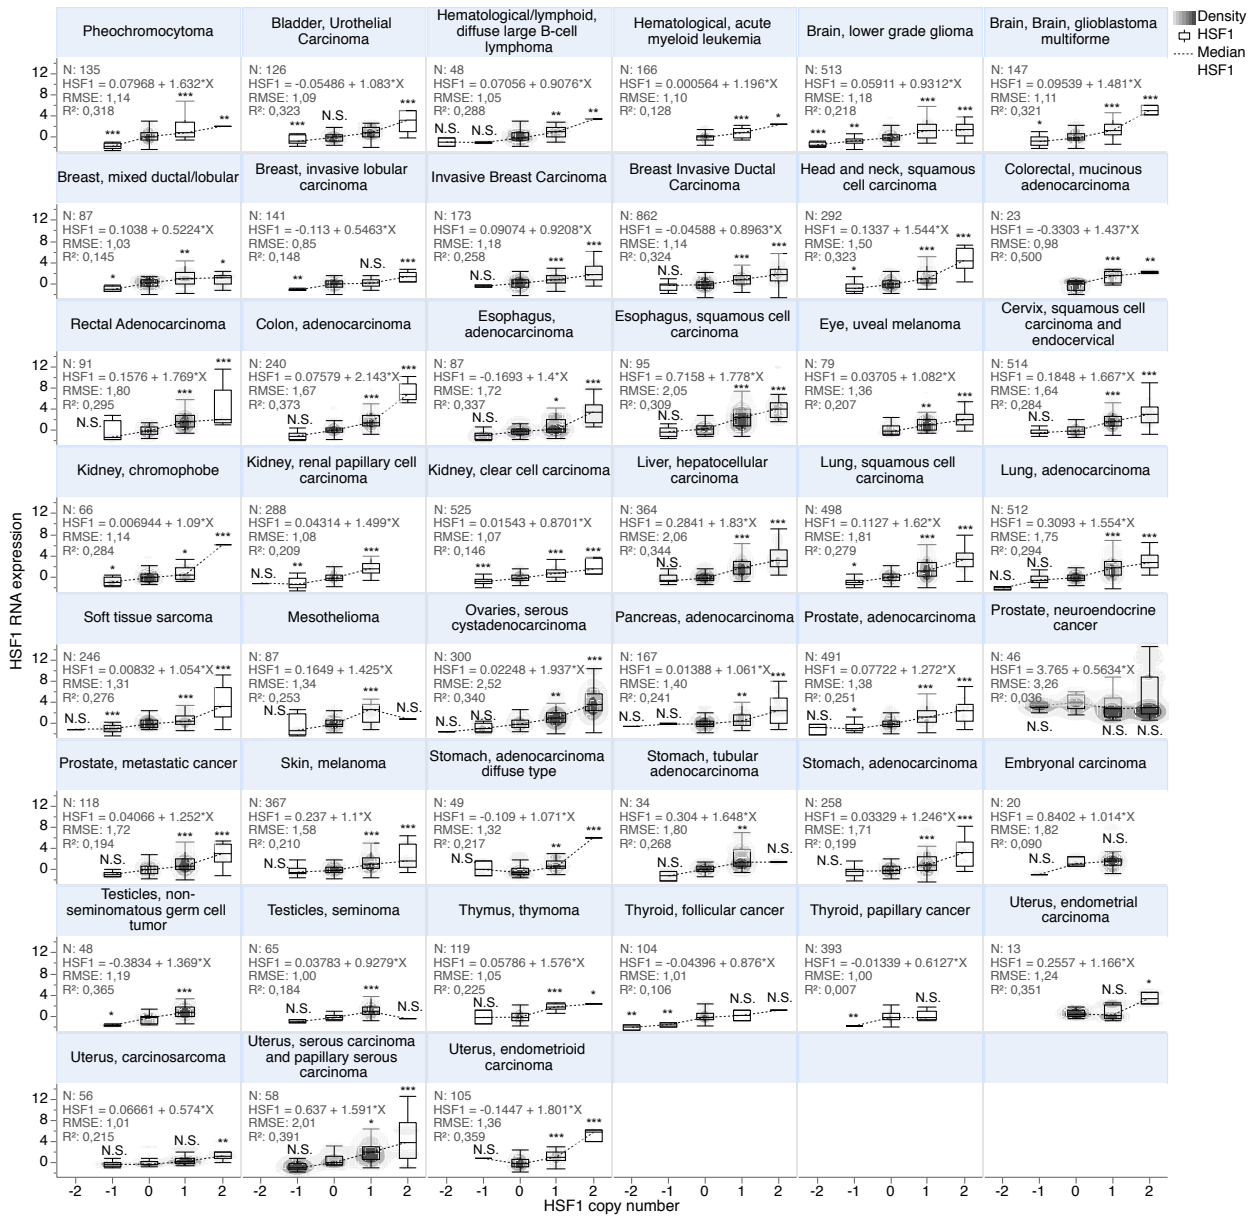

**Appendix 3. Expression of HSF1 in Function of HSF1 Copy Number Alteration per Histological Subtype.**

Box plots show the median values at the centred lines; box limits indicate the 25<sup>th</sup> and 75<sup>th</sup> percentiles; whiskers extend 1.5 times the interquartile range from the 25<sup>th</sup> and 75<sup>th</sup> percentiles. Dashed lines rely medians of each copy number category. Grey contour shows regions of density data. Caption boxes indicate N = number of patient, linear equations indicate in function of HSF1 expression (linear lines not show in the graphs), RMSE = root-mean-square error, R2 = determination coefficient. P-values were calculated using a two-tailed unpaired t-test compared to the diploid (i.e. 0). N.S., not significant (i.e. p>0.05), \*p<0.05, \*\*p<0.01, \*\*\*p<0.001

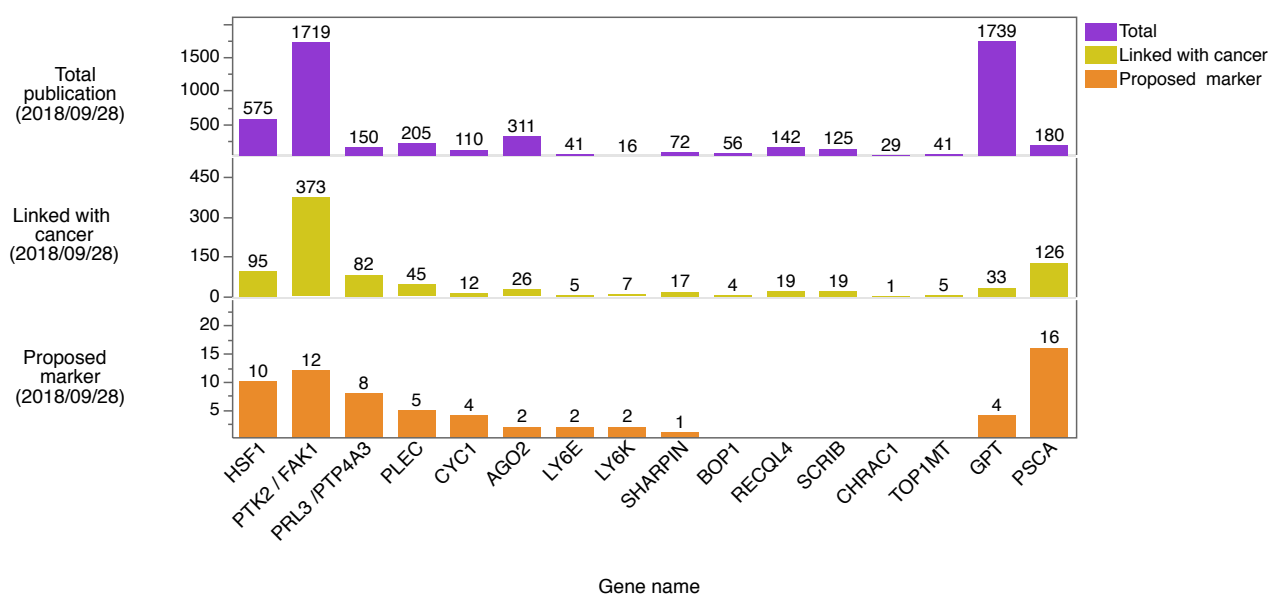

**Appendix 4. Number of publication of selected popular cancer-related genes per field located in 8q24.3 cytoband.**

Publication finding has been performed using GeneCard until the September 28<sup>th</sup> 2018. Top bar graph indicates the total number of publications per gene. Middle graph shows the number of publications associated in cancer (cancer model or cancer research) for each gene. Bottom graph displays the amount of publications where genes are suggested to be use as a biomarker.

| Gene name    | Gene description                                | Location | Gene type      | Entrez gene ID | Publications (2018/09/28) |                    | Proposed marker | GeneCards Summary                                                                                                                                                                                                                                                                                                                                                                                                                                             |
|--------------|-------------------------------------------------|----------|----------------|----------------|---------------------------|--------------------|-----------------|---------------------------------------------------------------------------------------------------------------------------------------------------------------------------------------------------------------------------------------------------------------------------------------------------------------------------------------------------------------------------------------------------------------------------------------------------------------|
|              |                                                 |          |                |                | Total                     | Linked with cancer |                 |                                                                                                                                                                                                                                                                                                                                                                                                                                                               |
| HSF1         | Heat Shock Transcription Factor 1               | 8q24.3   | Protein Coding | 3297           | 575                       | 95                 | 10              | HSF1 (Heat Shock Transcription Factor 1) is a Protein Coding gene. Diseases associated with HSF1 include Heat-Shock Rha 1 and Synucleinopathy. Among its related pathways are Legionellosis and Sertoli-Sertoli Cell Junction Dynamics. Gene Ontology (GO) annotations related to this gene include DNA binding transcription factor activity and chromatin binding. An important paralog of this gene is HSPF2.                                              |
| PTK2 / FAK1  | Protein Tyrosine Kinase 2                       | 8q24.3   | Protein coding | 5747           | 1719                      | 373                | 12              | PTK2 (Protein Tyrosine Kinase 2) is a Protein Coding gene. Diseases associated with PTK2 include Glioblastoma Multiforme and Colorectal Cancer. Among its related pathways are ERK Signaling and Focal Adhesion. Gene Ontology (GO) annotations related to this gene include transferase activity, transferring phosphorus-containing groups and protein tyrosine kinase activity. An important paralog of this gene is PTK2B.                                |
| PRL3 /PTP4A3 | Protein Tyrosine Phosphatase Type IVA, Member 3 | 8q24.3   | Protein coding | 11156          | 150                       | 82                 | 8               | PTP4A3 (Protein Tyrosine Phosphatase Type IVA, Member 3) is a Protein Coding gene. Among its related pathways are Signaling events mediated by PRL and PAK Pathway. Gene Ontology (GO) annotations related to this gene include phosphatase activity and protein tyrosine/threonine/serine/threonine phosphatase activity. An important paralog of this gene is PTP4A1.                                                                                       |
| PLEC         | Plectin                                         | 8q24.3   | Protein Coding | 5339           | 205                       | 45                 | 5               | PLEC (Plectin) is a Protein Coding gene. Diseases associated with PLEC include Epidermolysis Bullosa Simplex, Opa Type and Muscular Dystrophy. Lumb-Girdle Type 2Q. Among its related pathways are Collagen chain trimerization and Cytoskeletal Signaling. Gene Ontology (GO) annotations related to this gene include structural constituent of muscle. An important paralog of this gene is MACF1.                                                         |
| CYC1         | Cytochrome C1                                   | 8q24.3   | Protein Coding | 1537           | 110                       | 12                 | 4               | CYC1 (Cytochrome C1) is a Protein Coding gene. Diseases associated with CYC1 include Mitochondrial Complex III Deficiency, Nuclear Type 6 and Isolated Complex III Deficiency. Among its related pathways are Metabolism and Respiratory electron transport, ATP synthesis by chemiosmotic coupling, and heat production by uncoupling proteins. Gene Ontology (GO) annotations related to this gene include iron ion binding and electron transfer activity. |
| AGO2         | Argonaute 2, RISC Catalytic Component           | 8q24.3   | Protein coding | 27161          | 311                       | 26                 | 2               | AGO2 (Argonaute 2, RISC Catalytic Component) is a Protein Coding gene. Diseases associated with AGO2 include Colorectal Cancer and Chromosome 18P Deletion Syndrome. Among its related pathways are Gene Expression and Mitotic Prophase. Gene Ontology (GO) annotations related to this gene include nucleic acid binding and RNA binding. An important paralog of this gene is AGO1.                                                                        |
| LY6E         | Lymphocyte Antigen 6 Family Member E            | 8q24.3   | Protein Coding | 4081           | 41                        | 5                  | 2               | LY6E (Lymphocyte Antigen 6 Family Member E) is a Protein Coding gene. Diseases associated with LY6E include Acute Promyelocytic Leukemia. Among its related pathways are Metabolism of proteins and Post-translational modification- synthesis of GPI-anchored proteins.                                                                                                                                                                                      |
| LY6K         | Lymphocyte Antigen 6 Family Member K            | 8q24.3   | Protein Coding | 54742          | 16                        | 7                  | 2               | LY6K (Lymphocyte Antigen 6 Family Member K) is a Protein Coding gene. Diseases associated with LY6K include Cyclothymic Disorder. Among its related pathways are Metabolism of proteins and Post-translational modification- synthesis of GPI-anchored proteins.                                                                                                                                                                                              |
| SHARPIN      | SHANK Associated RH Domain Interactor           | 8q24.3   | Protein Coding | 81858          | 72                        | 17                 | 1               | SHARPIN (SHANK Associated RH Domain Interactor) is a Protein Coding gene. Diseases associated with SHARPIN include Glycogen Storage Disease Iv. Among its related pathways are TNF signaling (REACTOME) and Protein-protein interactions at synapses. Gene Ontology (GO) annotations related to this gene include identical protein binding and polyubiquitin modification-dependent protein binding. An important paralog of this gene is RBCK1.             |
| BOP1         | Block Of Proliferation 1                        | 8q24.3   | Protein Coding | 23246          | 56                        | 4                  | 0               | BOP1 (Block Of Proliferation 1) is a Protein Coding gene. Among its related pathways are rRNA processing in the nucleus and cytosol and Gene Expression. Gene Ontology (GO) annotations related to this gene include ribonucleoprotein complex binding.                                                                                                                                                                                                       |
| RECQL4       | RecQ Like Helicase 4                            | 8q24.3   | Protein Coding | 9401           | 142                       | 19                 | 0               | RECQL4 (RecQ Like Helicase 4) is a Protein Coding gene. Diseases associated with RECQL4 include Baller-Gerold Syndrome and Rapadilino Syndrome. Among its related pathways are DNA Damage. Gene Ontology (GO) annotations related to this gene include nucleic acid binding and annealing helicase activity. An important paralog of this gene is BLM.                                                                                                        |
| SCRIB        | Scribbled Planar Cell Polarity Protein          | 8q24.3   | Protein Coding | 23513          | 125                       | 19                 | 0               | SCRIB (Scribbled Planar Cell Polarity Protein) is a Protein Coding gene. Diseases associated with SCRIB include Neural Tube Defects and Tick-Borne Encephalitis. Among its related pathways are Cytoskeletal Signaling and Signaling by Wnt. An important paralog of this gene is LRRRC7.                                                                                                                                                                     |
| CHRA1        | Chromatin Accessibility Complex 1               | 8q24.3   | Protein coding | 54108          | 29                        | 1                  | 0               | CHRA1 (Chromatin Accessibility Complex 1) is a Protein Coding gene. Gene Ontology (GO) annotations related to this gene include sequence-specific DNA binding and DNA-directed DNA polymerase activity.                                                                                                                                                                                                                                                       |
| TOP1MT       | DNA Topoisomerase I Mitochondrial               | 8q24.3   | Protein Coding | 116447         | 41                        | 5                  | 0               | TOP1MT (DNA Topoisomerase I Mitochondrial) is a Protein Coding gene. Gene Ontology (GO) annotations related to this gene include DNA topoisomerase type I activity and DNA topoisomerase type II (ATP-hydrolyzing) activity. An important paralog of this gene is TOP1.                                                                                                                                                                                       |
| GPT          | Glutamic-Pyruvic Transaminase                   | 8q24.3   | Protein Coding | 2875           | 1739                      | 33                 | 4               | GPT (Glutamic-Pyruvic Transaminase) is a Protein Coding gene. Diseases associated with GPT include Hepatitis and Cholecholethiasis. Among its related pathways are Cori Cycle and Alanine and aspartate metabolism. Gene Ontology (GO) annotations related to this gene include pyridoxal phosphate binding and L-alanine:2-oxoglutarate aminotransferase activity. An important paralog of this gene is GPT2.                                                |
| PSCA         | Prostate Stem Cell Antigen                      | 8q24.3   | Protein Coding | 8000           | 180                       | 126                | 16              | PSCA (Prostate Stem Cell Antigen) is a Protein Coding gene. Diseases associated with PSCA include Colloid Carcinoma Of The Pancreas and Gallbladder Adenocarcinoma. Among its related pathways are Metabolism of proteins and Post-translational modification- synthesis of GPI-anchored proteins.                                                                                                                                                            |

| Total publication | 5511 | 869 | 66 |
|-------------------|------|-----|----|
|-------------------|------|-----|----|

### Appendix 4. Description of selected cancer-related genes per field located in 8q24.3 cytoband.

Descriptive table for popular cancer-related genes per field located in 8q24.3 cytoband. Description summary were obtained from GeneCards

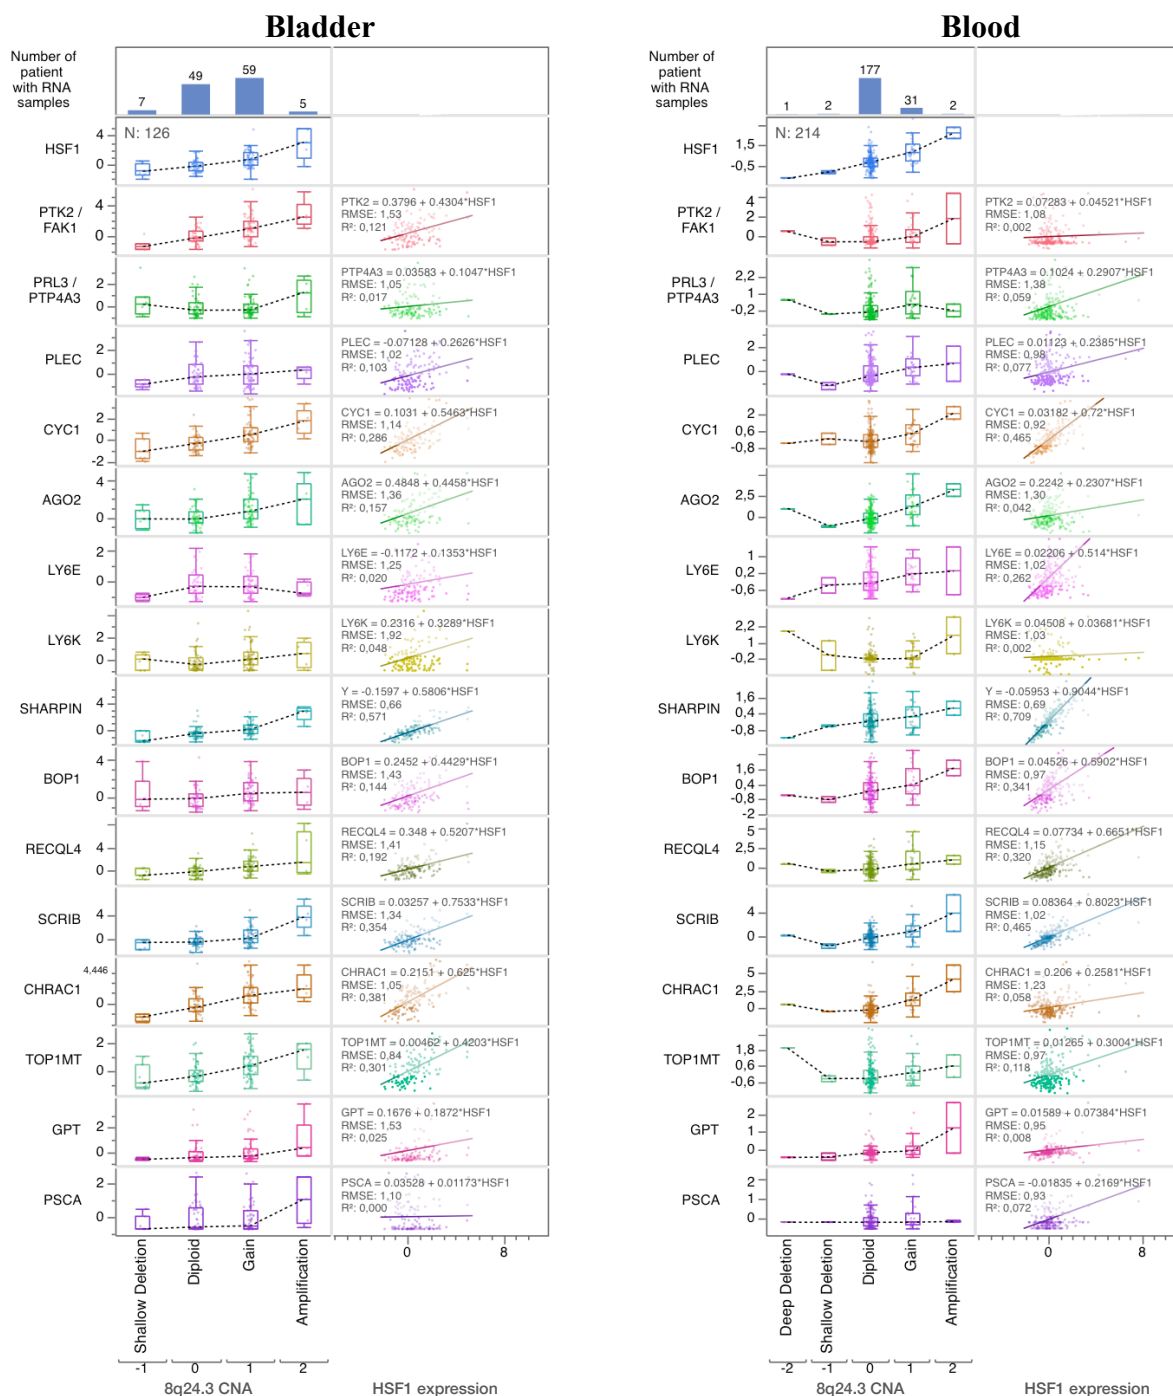

**Appendix 5. Influence of 8q24.3 Copy Number on other Cancer-Related Genes Expression Located in 8q24.3 Loci and Comparison with HSF1 Related Expression per Tissue.**

Left panel displays the HSF1 RNA expression in function of 8q24.3 copy number. Box plots for each graph of each gene described in **appendix 4** show the median values at the centred lines; box limits indicate the 25<sup>th</sup> and 75<sup>th</sup> percentiles; whiskers extend 1.5 times the interquartile range from the 25<sup>th</sup> and 75<sup>th</sup> percentiles. Dashed lines rely medians of each copy number category. N = number of patient in each 8q24.3 copy number alteration category are shown in bar graph in top left panel. Right panel displays the RNA expression of the indicated gene in function of HSF1 RNA expression. Each dot represents a patient data. Linear trends are indicated and linear equations are displayed in the caption box for each gene. RMSE = root-mean-square error, R<sup>2</sup> = determination coefficient.

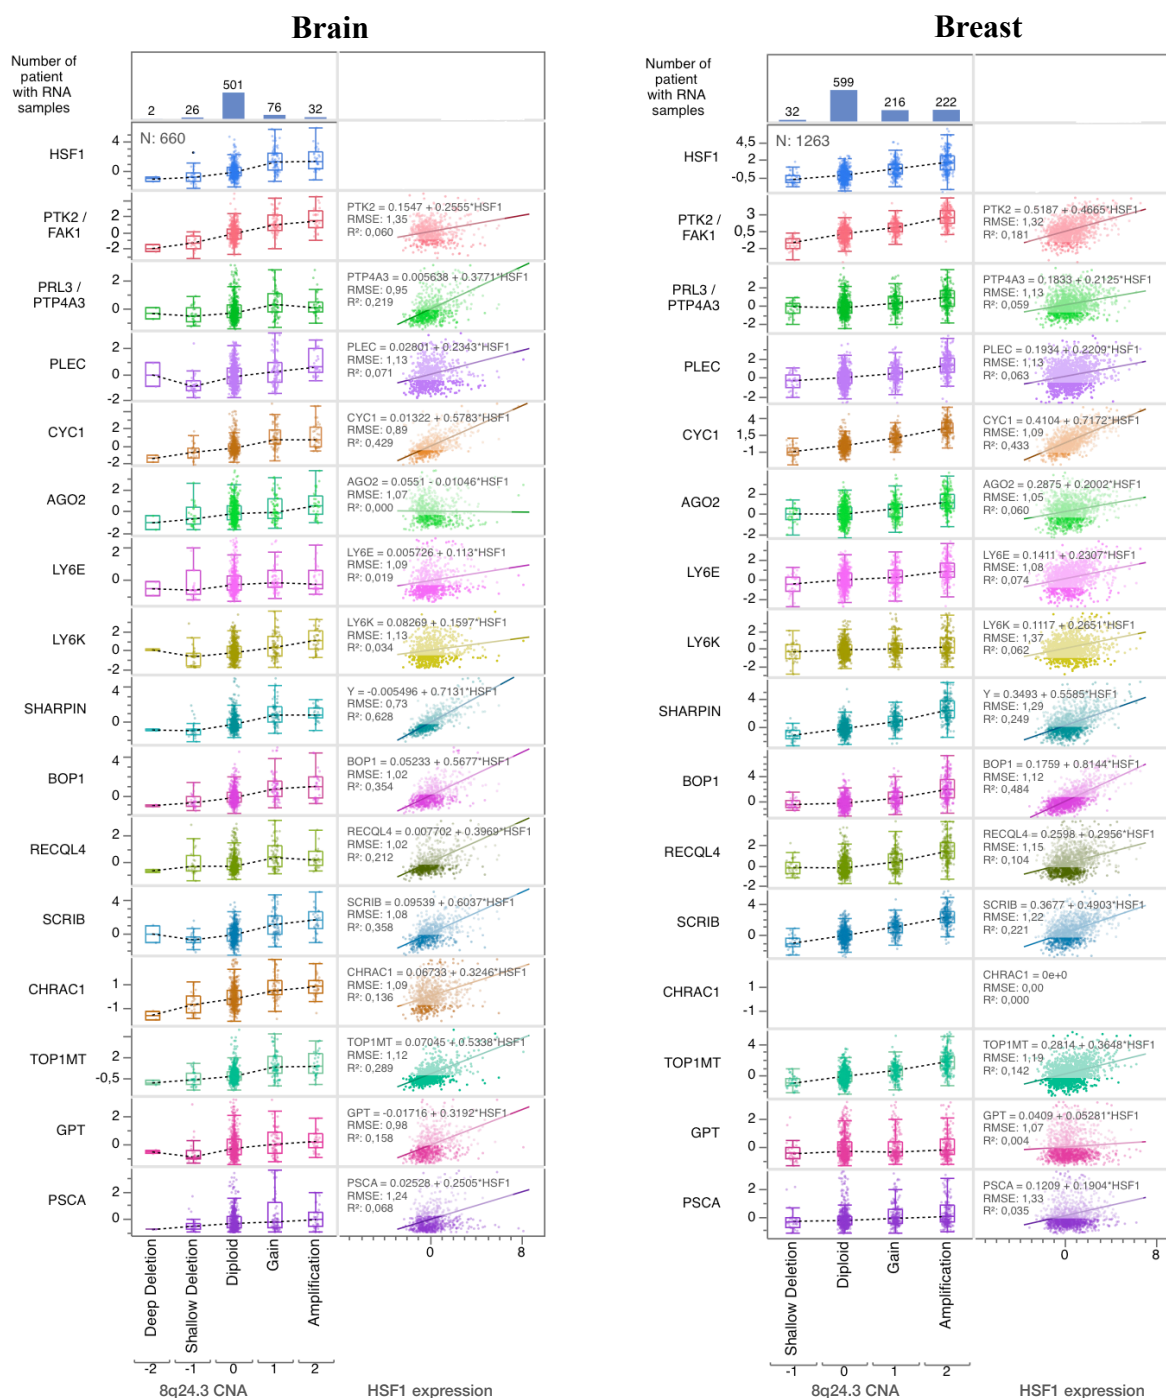

**Appendix 5. Influence of 8q24.3 Copy Number on other Cancer-Related Genes Expression Located in 8q24.3 Loci and Comparison with HSF1 Related Expression per Tissue.**

Left panel displays the HSF1 RNA expression in function of 8q24.3 copy number. Box plots for each graph of each gene described in **appendix 4** show the median values at the centred lines; box limits indicate the 25<sup>th</sup> and 75<sup>th</sup> percentiles; whiskers extend 1.5 times the interquartile range from the 25<sup>th</sup> and 75<sup>th</sup> percentiles. Dashed lines rely medians of each copy number category. N = number of patient in each 8q24.3 copy number alteration category are shown in bar graph in top left panel. Right panel displays the RNA expression of the indicated gene in function of HSF1 RNA expression. Each dot represents a patient data. Linear trends are indicated and linear equations are displayed in the caption box for each gene. RMSE = root-mean-square error, R<sup>2</sup> = determination coefficient.

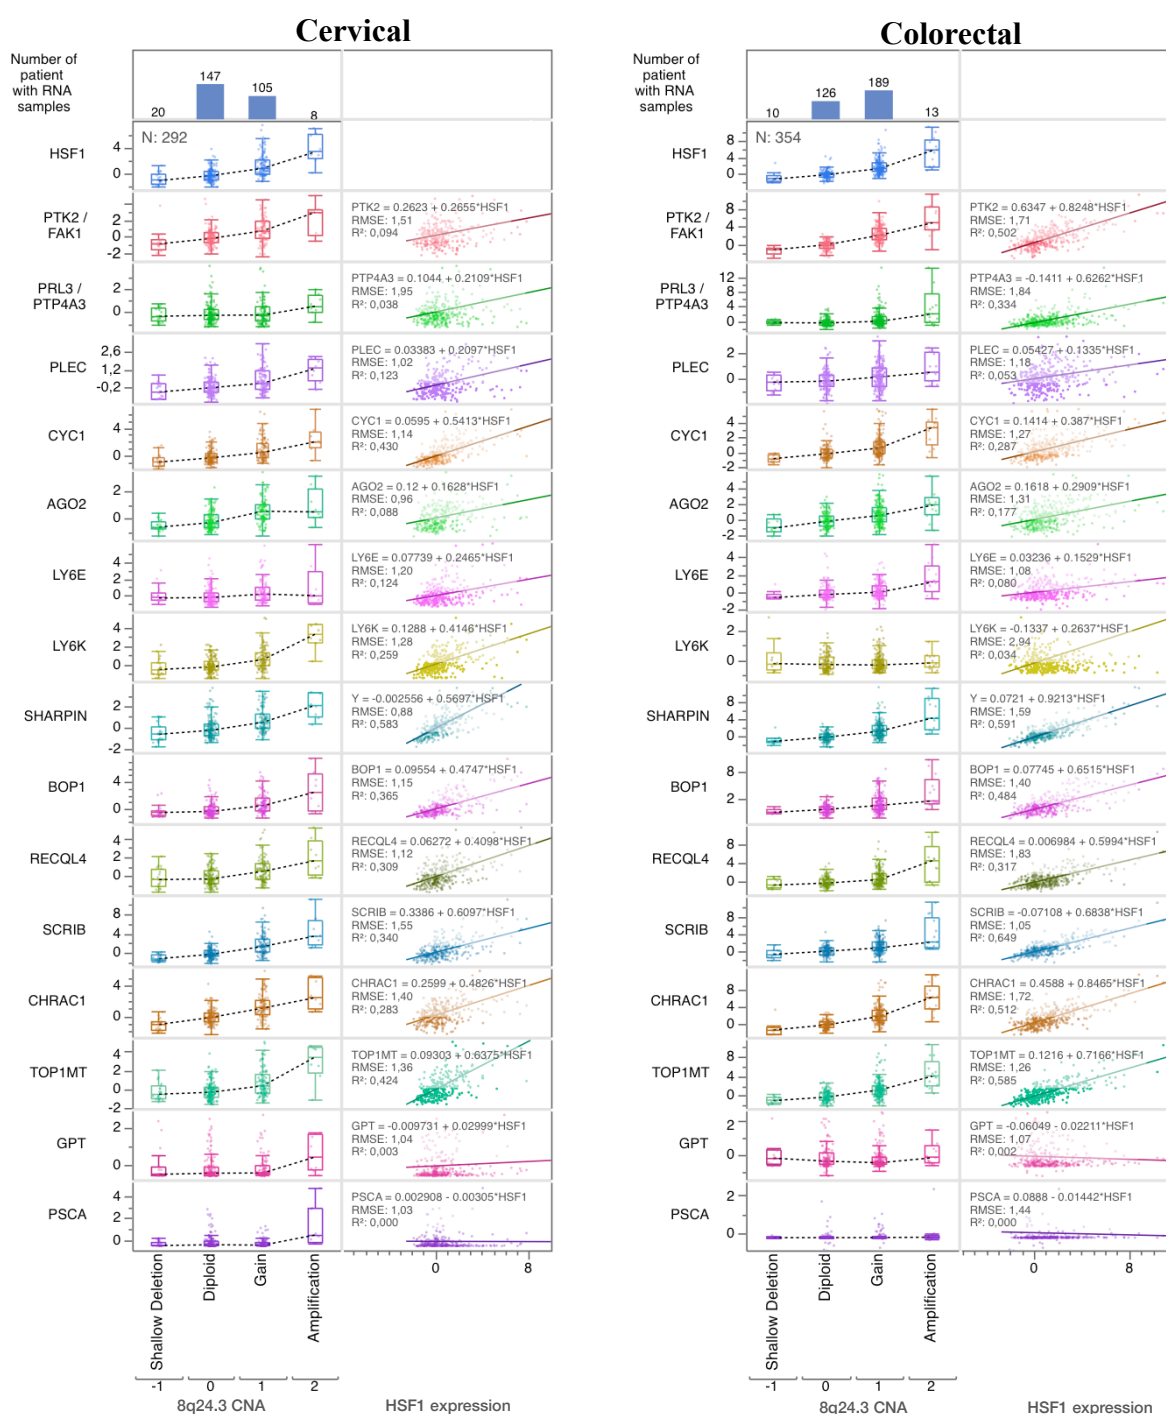

**Appendix 5. Influence of 8q24.3 Copy Number on other Cancer-Related Genes Expression Located in 8q24.3 Loci and Comparison with HSF1 Related Expression per Tissue.**

Left panel displays the HSF1 RNA expression in function of 8q24.3 copy number. Box plots for each graph of each gene described in **appendix 4** show the median values at the centred lines; box limits indicate the 25<sup>th</sup> and 75<sup>th</sup> percentiles; whiskers extend 1.5 times the interquartile range from the 25<sup>th</sup> and 75<sup>th</sup> percentiles. Dashed lines rely medians of each copy number category. N = number of patient in each 8q24.3 copy number alteration category are shown in bar graph in top left panel. Right panel displays the RNA expression of the indicated gene in function of HSF1 RNA expression. Each dot represents a patient data. Linear trends are indicated and linear equations are displayed in the caption box for each gene. RMSE = root-mean-square error, R<sup>2</sup> = determination coefficient.





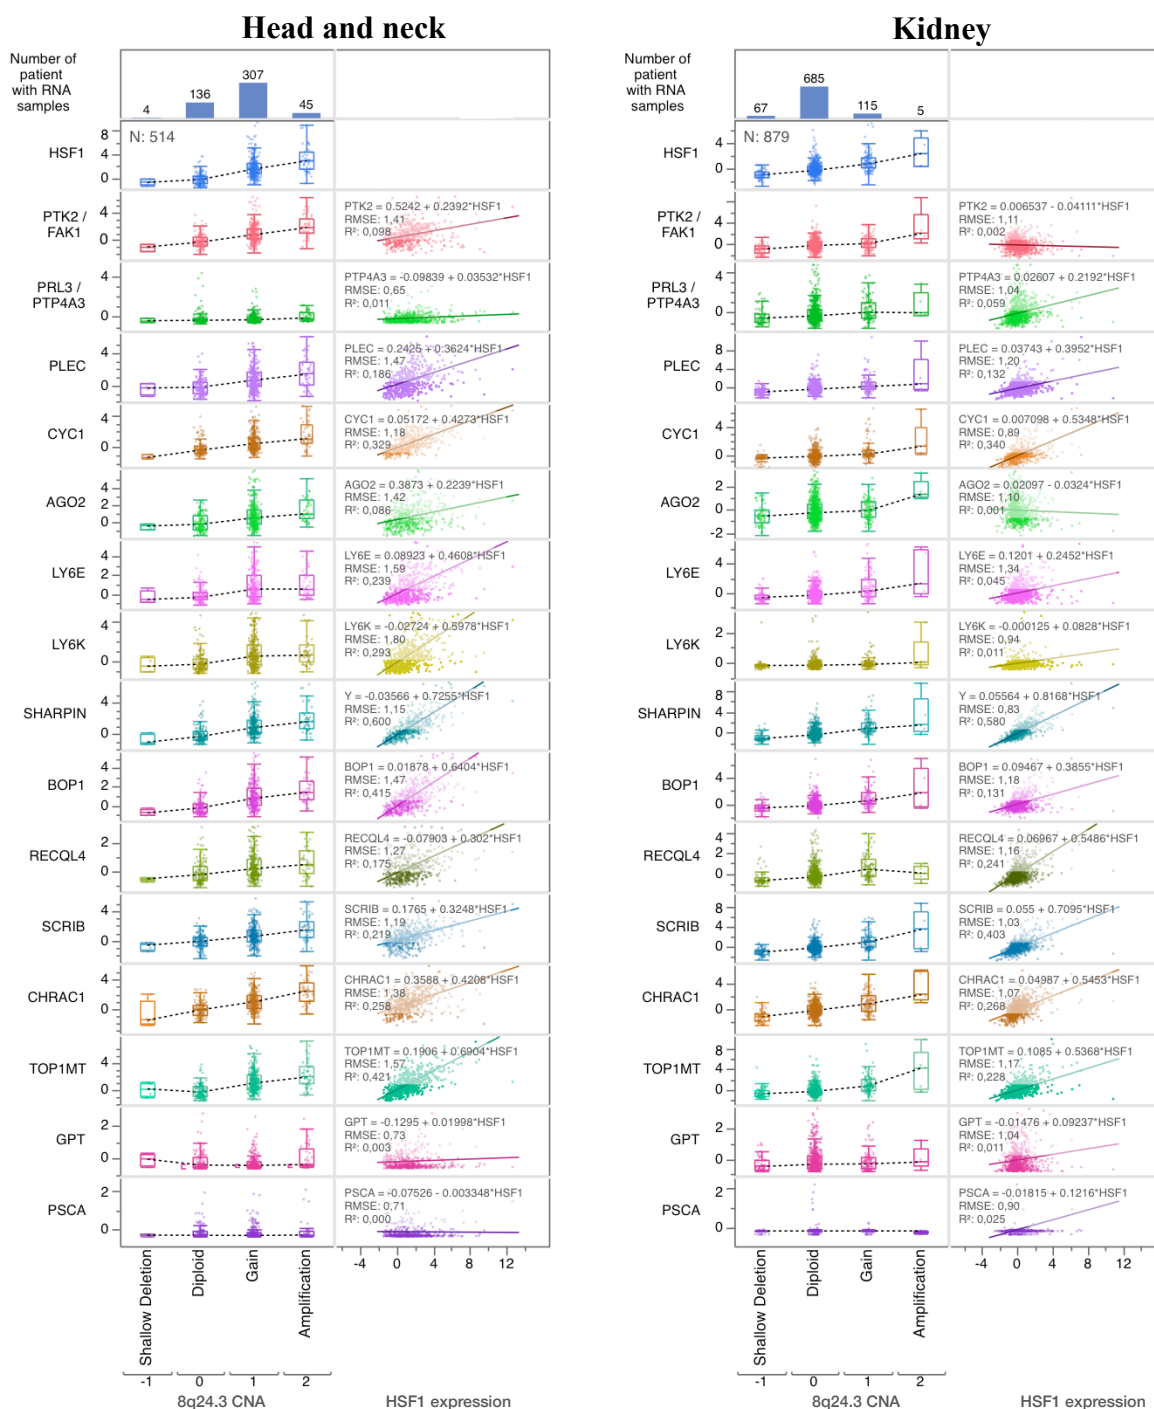

**Appendix 5. Influence of 8q24.3 Copy Number on other Cancer-Related Genes Expression Located in 8q24.3 Loci and Comparison with HSF1 Related Expression per Tissue.**

Left panel displays the HSF1 RNA expression in function of 8q24.3 copy number. Box plots for each graph of each gene described in **appendix 4** show the median values at the centred lines; box limits indicate the 25<sup>th</sup> and 75<sup>th</sup> percentiles; whiskers extend 1.5 times the interquartile range from the 25<sup>th</sup> and 75<sup>th</sup> percentiles. Dashed lines rely medians of each copy number category. N = number of patient in each 8q24.3 copy number alteration category are shown in bar graph in top left panel. Right panel displays the RNA expression of the indicated gene in function of HSF1 RNA expression. Each dot represents a patient data. Linear trends are indicated and linear equations are displayed in the caption box for each gene. RMSE = root-mean-square error, R<sup>2</sup> = determination coefficient.

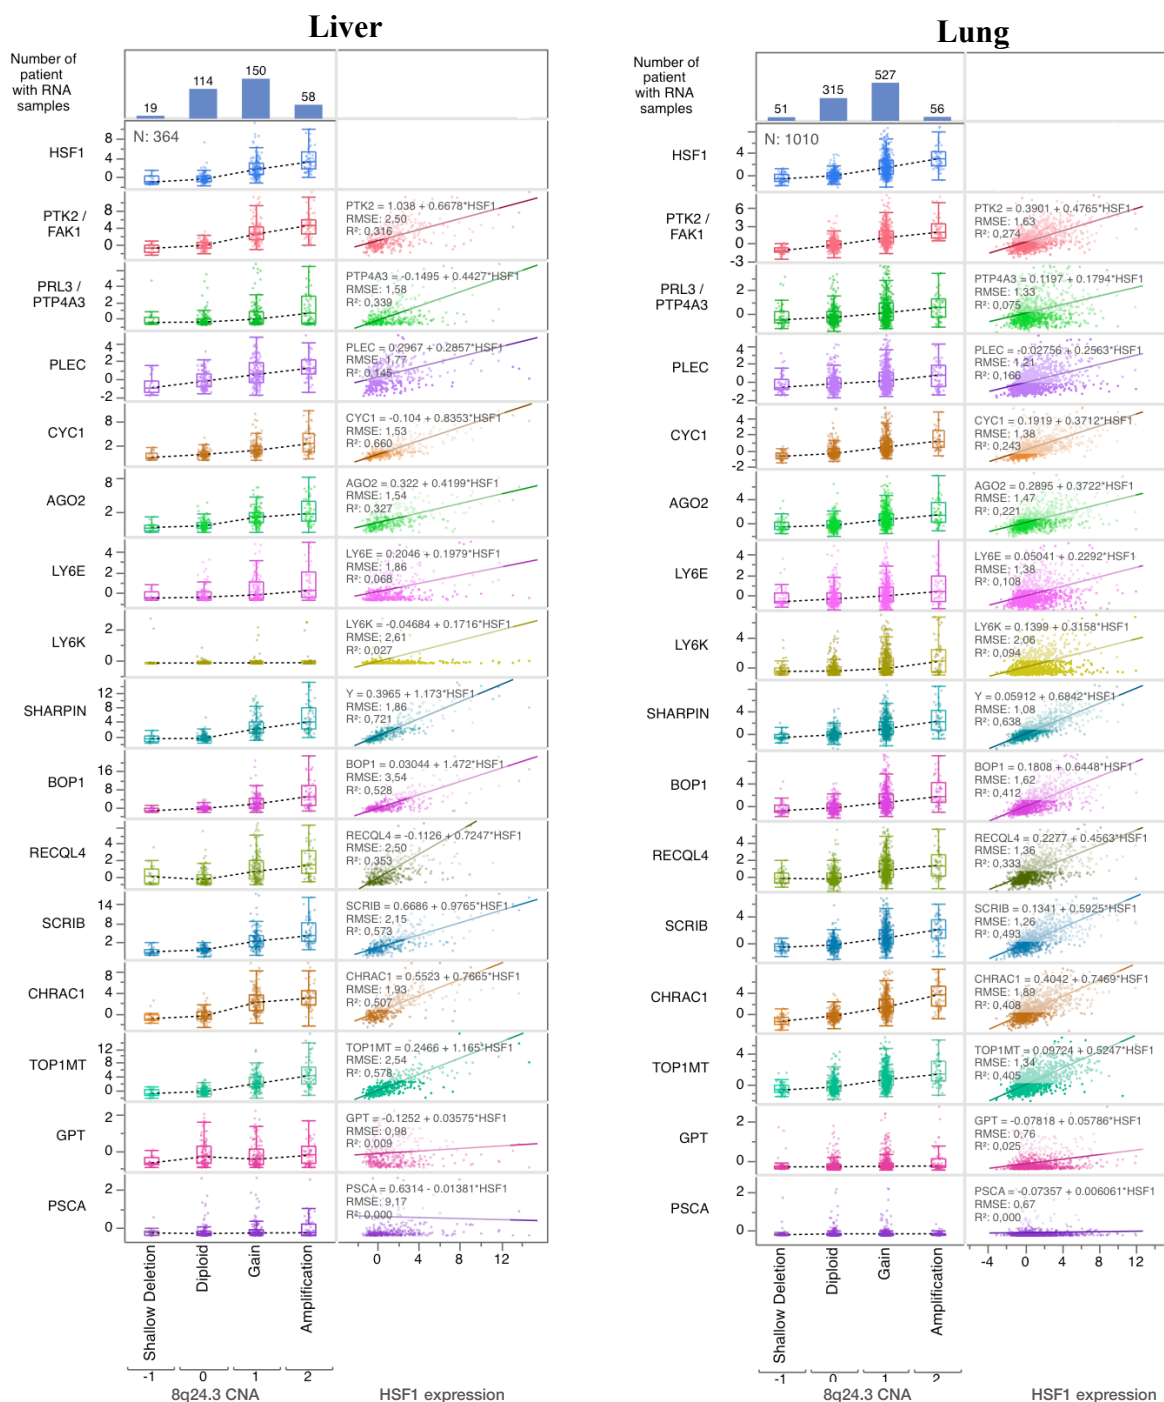

**Appendix 5. Influence of 8q24.3 Copy Number on other Cancer-Related Genes Expression Located in 8q24.3 Loci and Comparison with HSF1 Related Expression per Tissue.**

Left panel displays the HSF1 RNA expression in function of 8q24.3 copy number. Box plots for each graph of each gene described in **appendix 4** show the median values at the centred lines; box limits indicate the 25<sup>th</sup> and 75<sup>th</sup> percentiles; whiskers extend 1.5 times the interquartile range from the 25<sup>th</sup> and 75<sup>th</sup> percentiles. Dashed lines rely medians of each copy number category. N = number of patient in each 8q24.3 copy number alteration category are shown in bar graph in top left panel. Right panel displays the RNA expression of the indicated gene in function of HSF1 RNA expression. Each dot represents a patient data. Linear trends are indicated and linear equations are displayed in the caption box for each gene. RMSE = root-mean-square error, R<sup>2</sup> = determination coefficient.

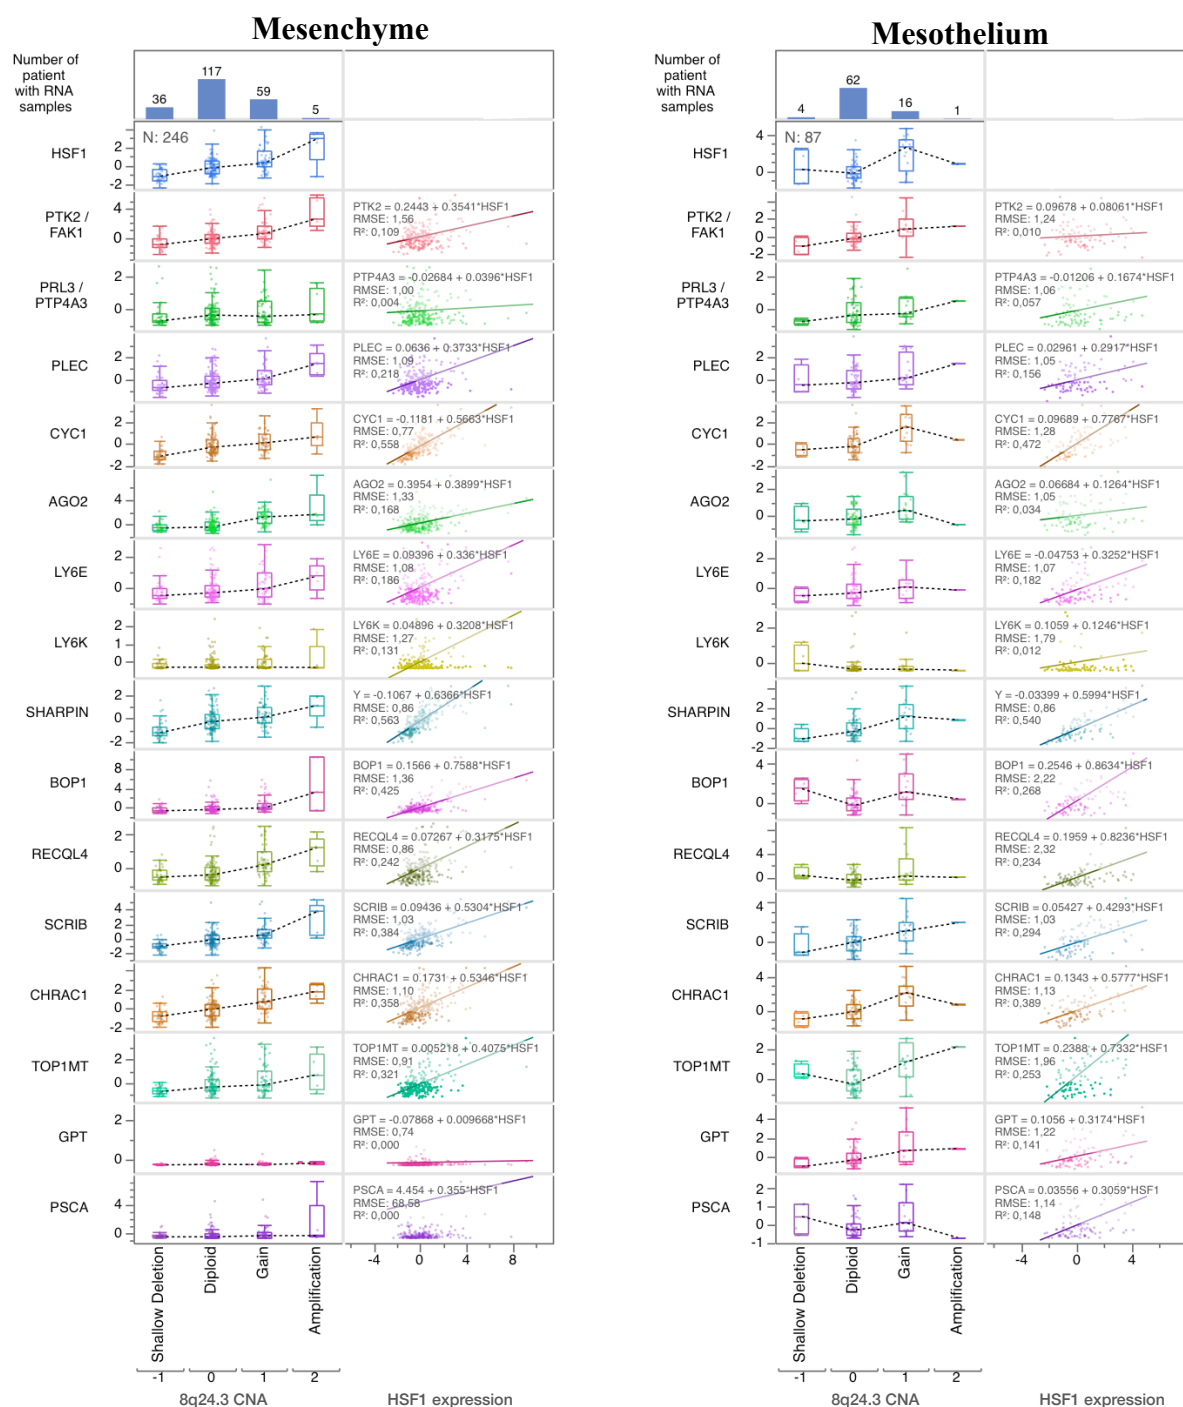

**Appendix 5. Influence of 8q24.3 Copy Number on other Cancer-Related Genes Expression Located in 8q24.3 Loci and Comparison with HSF1 Related Expression per Tissue.**

Left panel displays the HSF1 RNA expression in function of 8q24.3 copy number. Box plots for each graph of each gene described in **appendix 4** show the median values at the centred lines; box limits indicate the 25<sup>th</sup> and 75<sup>th</sup> percentiles; whiskers extend 1.5 times the interquartile range from the 25<sup>th</sup> and 75<sup>th</sup> percentiles. Dashed lines rely medians of each copy number category. N = number of patient in each 8q24.3 copy number alteration category are shown in bar graph in top left panel. Right panel displays the RNA expression of the indicated gene in function of HSF1 RNA expression. Each dot represents a patient data. Linear trends are indicated and linear equations are displayed in the caption box for each gene. RMSE = root-mean-square error,  $R^2$  = determination coefficient.

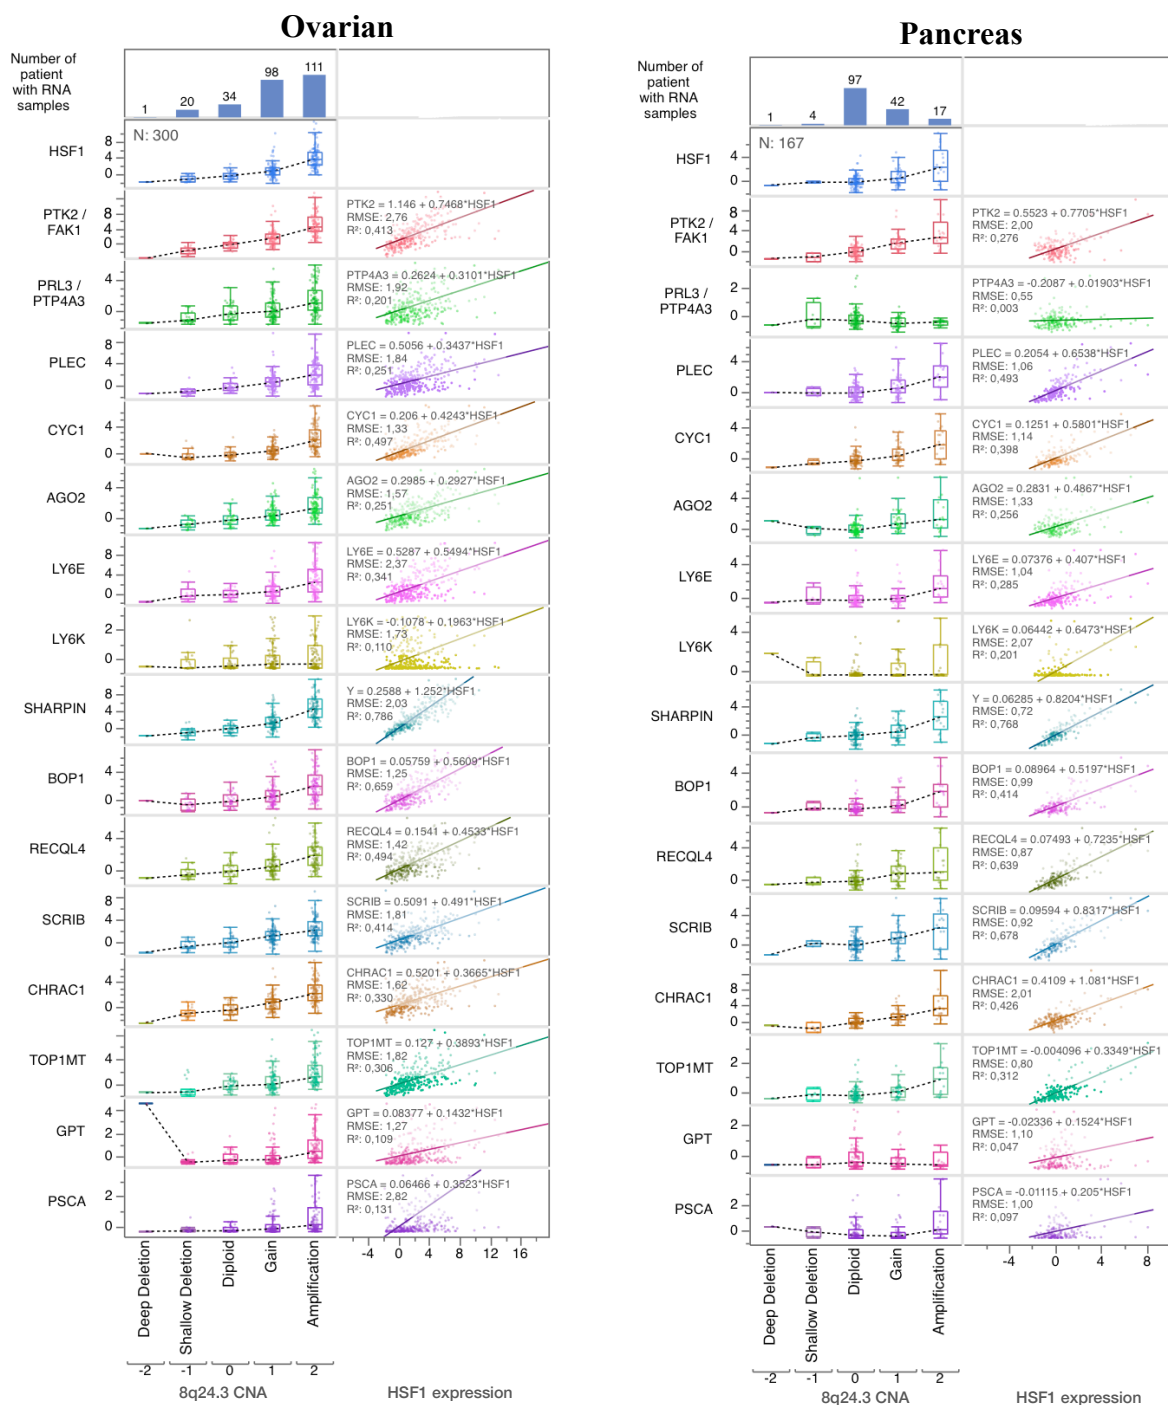

**Appendix 5. Influence of 8q24.3 Copy Number on other Cancer-Related Genes Expression Located in 8q24.3 Loci and Comparison with HSF1 Related Expression per Tissue.**

Left panel displays the HSF1 RNA expression in function of 8q24.3 copy number. Box plots for each graph of each gene described in **appendix 4** show the median values at the centred lines; box limits indicate the 25<sup>th</sup> and 75<sup>th</sup> percentiles; whiskers extend 1.5 times the interquartile range from the 25<sup>th</sup> and 75<sup>th</sup> percentiles. Dashed lines rely medians of each copy number category. N = number of patient in each 8q24.3 copy number alteration category are shown in bar graph in top left panel. Right panel displays the RNA expression of the indicated gene in function of HSF1 RNA expression. Each dot represents a patient data. Linear trends are indicated and linear equations are displayed in the caption box for each gene. RMSE = root-mean-square error, R<sup>2</sup> = determination coefficient.

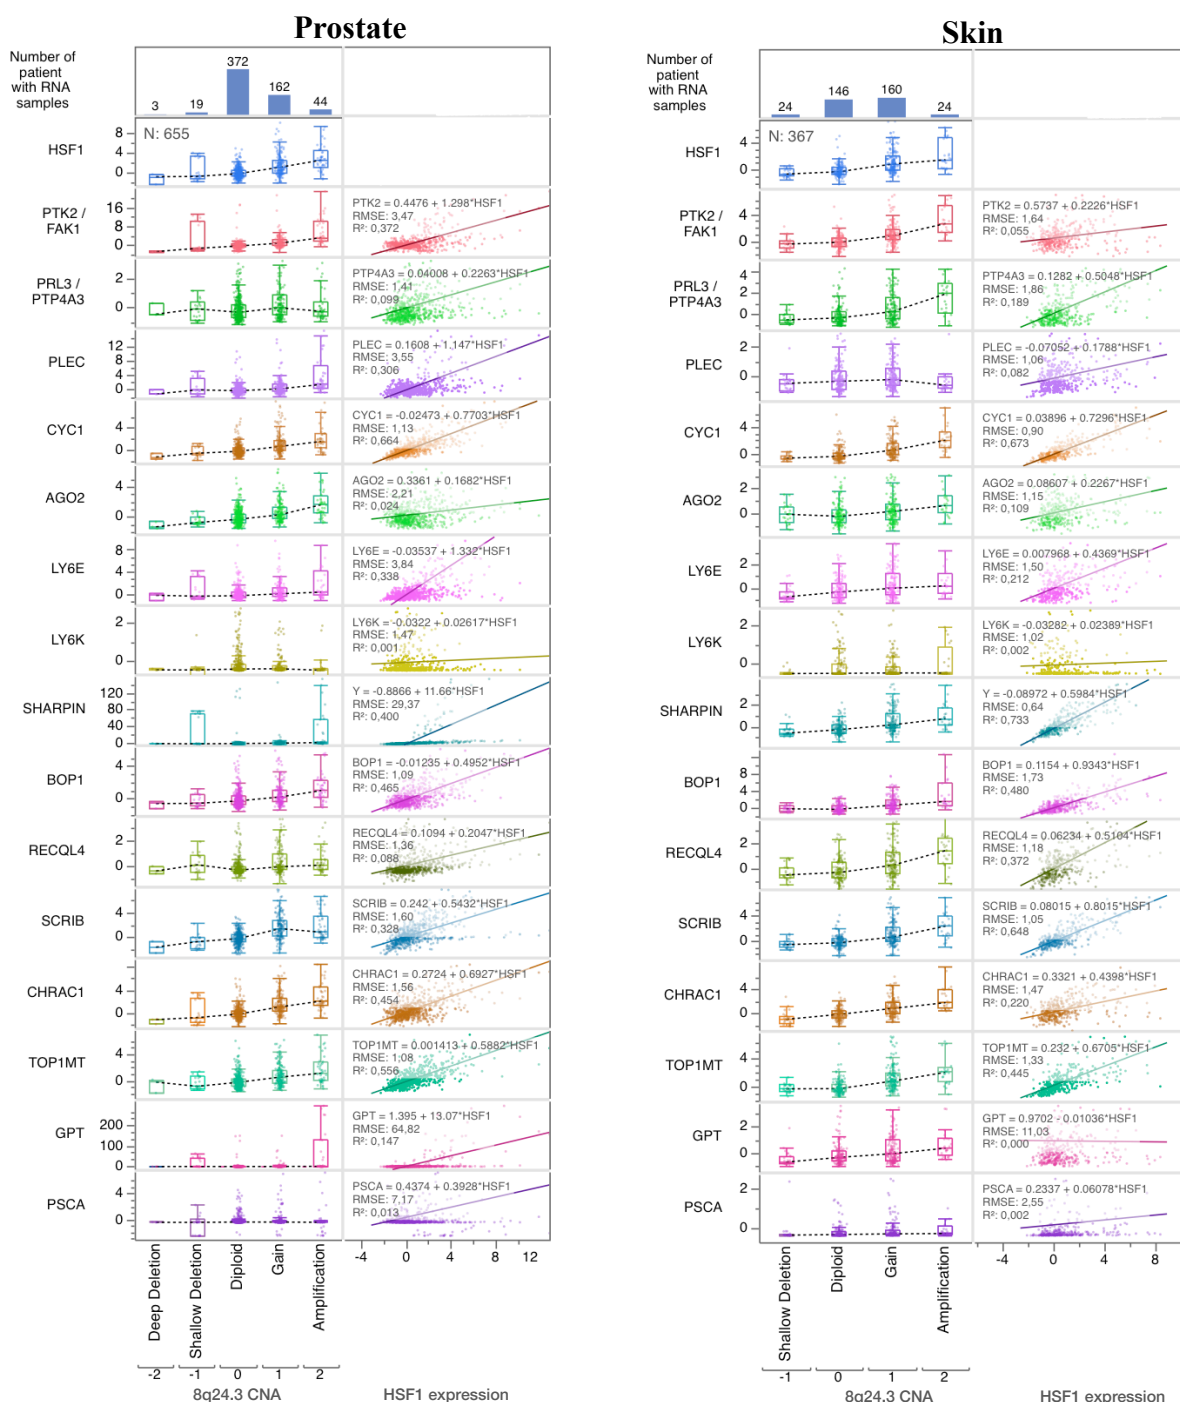

### Appendix 5. Influence of 8q24.3 Copy Number on other Cancer-Related Genes Expression Located in 8q24.3 Loci and Comparison with HSF1 Related Expression per Tissue.

Left panel displays the HSF1 RNA expression in function of 8q24.3 copy number. Box plots for each graph of each gene described in **appendix 4** show the median values at the centred lines; box limits indicate the 25<sup>th</sup> and 75<sup>th</sup> percentiles; whiskers extend 1.5 times the interquartile range from the 25<sup>th</sup> and 75<sup>th</sup> percentiles. Dashed lines rely medians of each copy number category. N = number of patient in each 8q24.3 copy number alteration category are shown in bar graph in top left panel. Right panel displays the RNA expression of the indicated gene in function of HSF1 RNA expression. Each dot represents a patient data. Linear trends are indicated and linear equations are displayed in the caption box for each gene. RMSE = root-mean-square error, R<sup>2</sup> = determination coefficient.

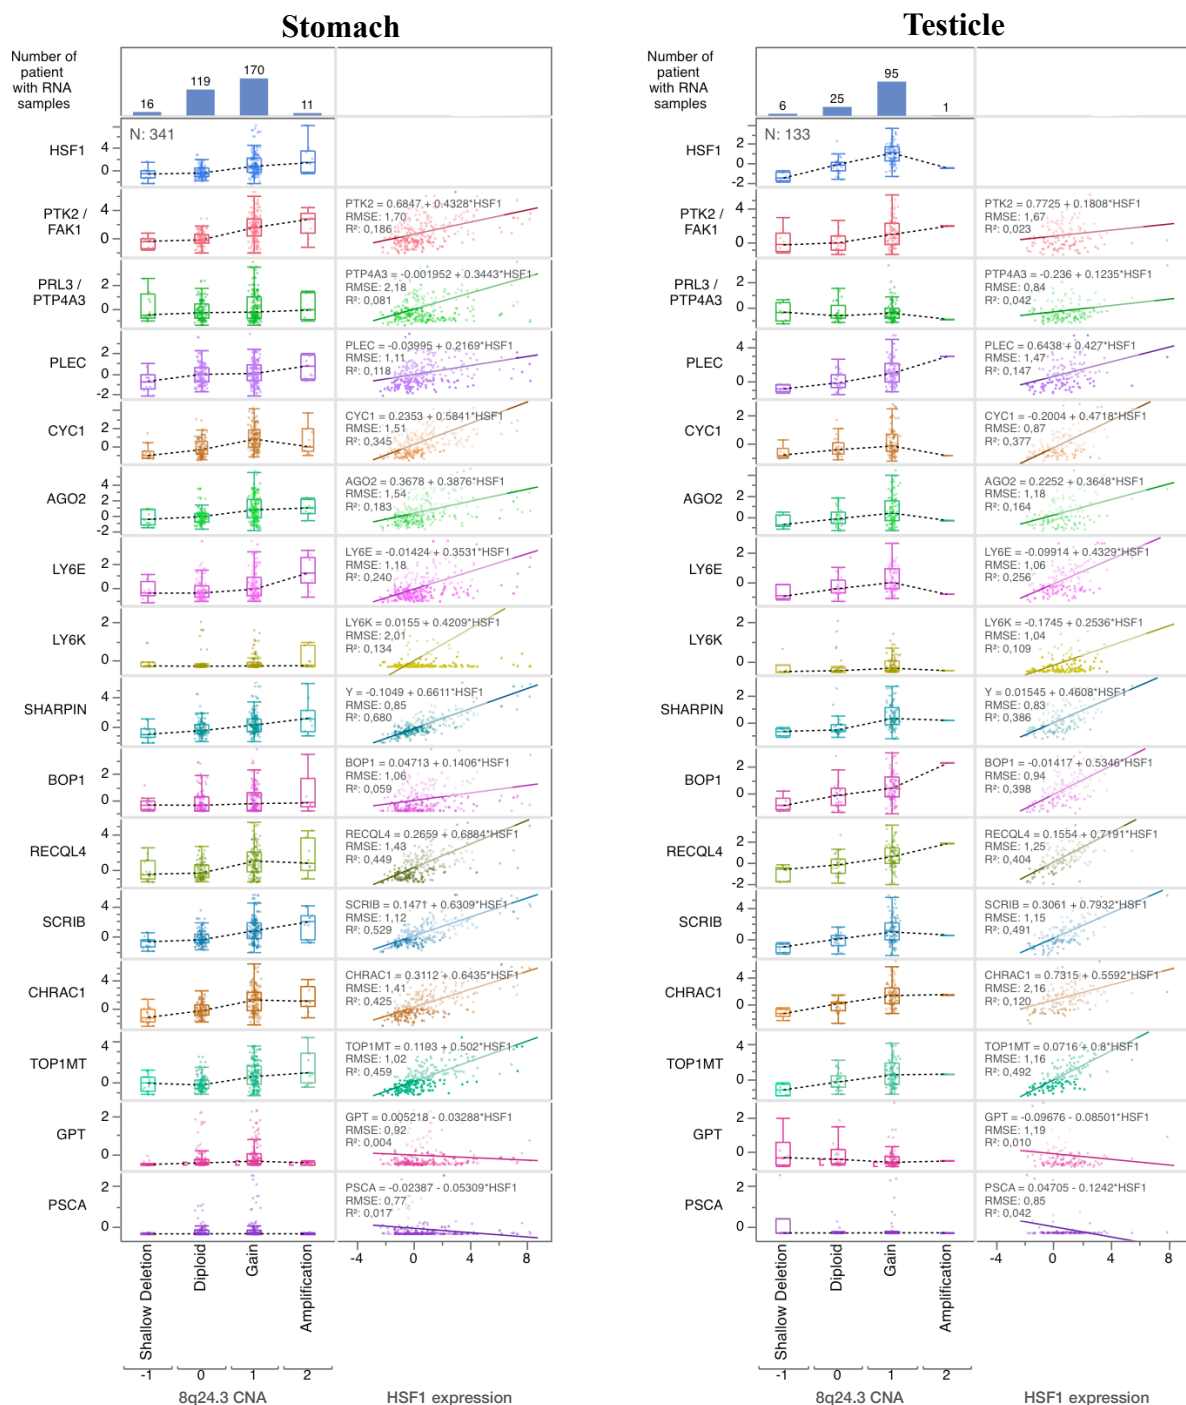

**Appendix 5. Influence of 8q24.3 Copy Number on other Cancer-Related Genes Expression Located in 8q24.3 Loci and Comparison with HSF1 Related Expression per Tissue.**

Left panel displays the HSF1 RNA expression in function of 8q24.3 copy number. Box plots for each graph of each gene described in **appendix 4** show the median values at the centred lines; box limits indicate the 25<sup>th</sup> and 75<sup>th</sup> percentiles; whiskers extend 1.5 times the interquartile range from the 25<sup>th</sup> and 75<sup>th</sup> percentiles. Dashed lines rely medians of each copy number category. N = number of patient in each 8q24.3 copy number alteration category are shown in bar graph in top left panel. Right panel displays the RNA expression of the indicated gene in function of HSF1 RNA expression. Each dot represents a patient data. Linear trends are indicated and linear equations are displayed in the caption box for each gene. RMSE = root-mean-square error, R<sup>2</sup> = determination coefficient.

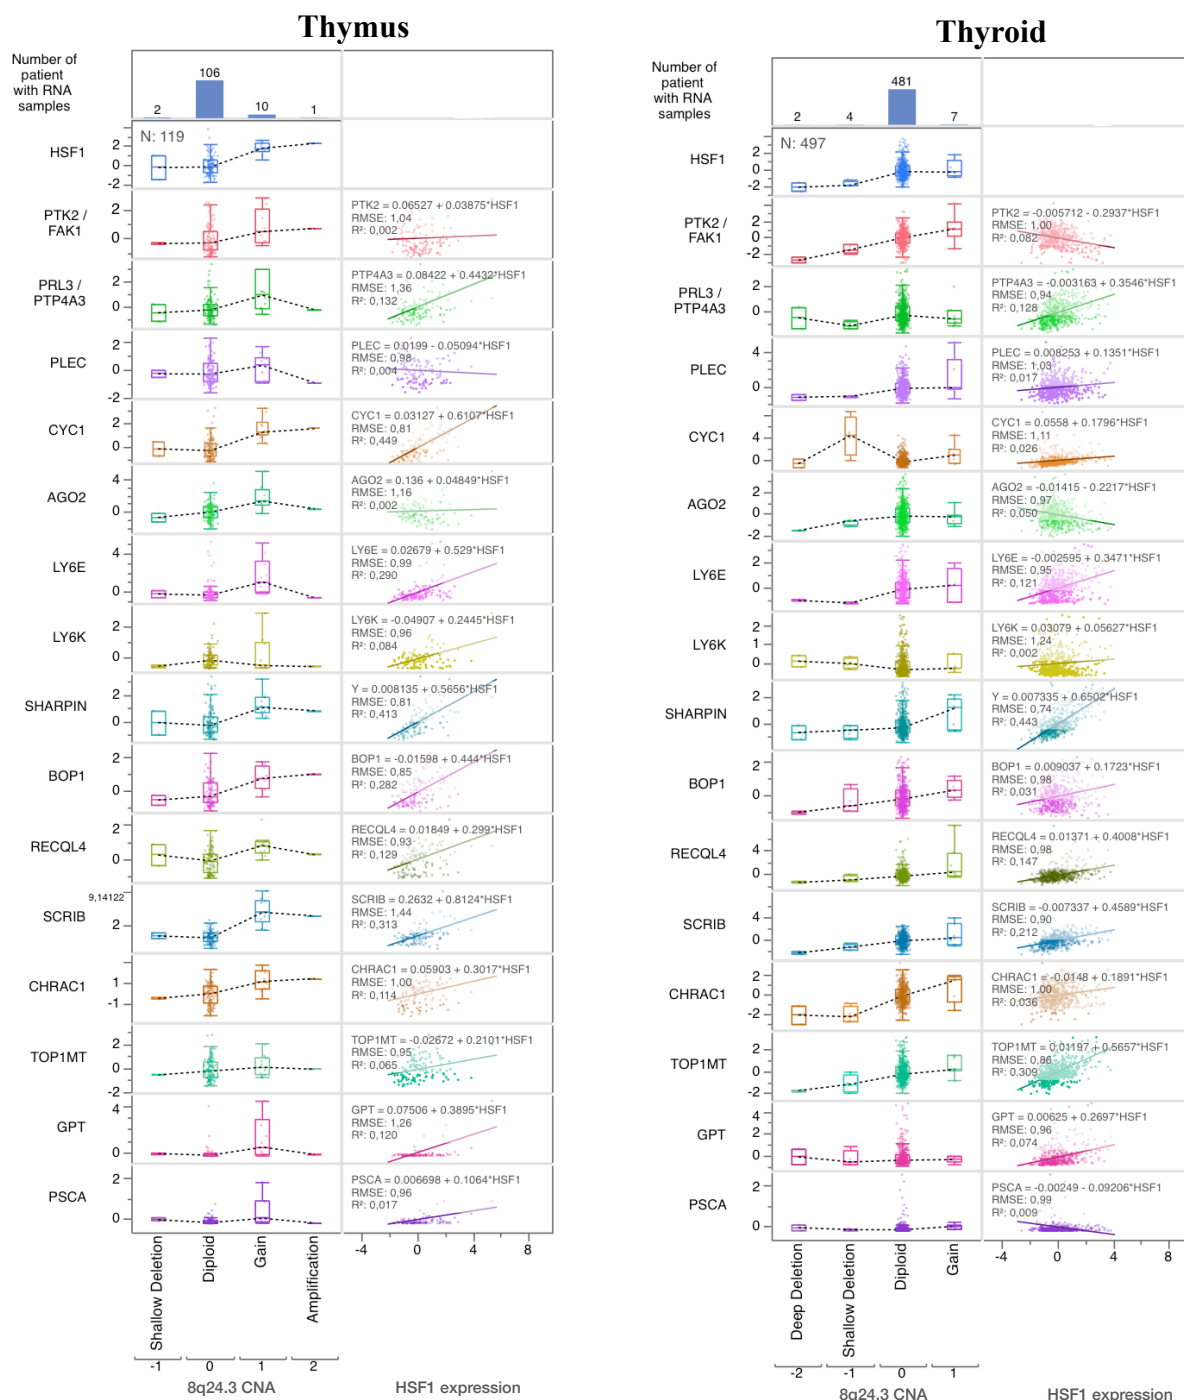

**Appendix 5. Influence of 8q24.3 Copy Number on other Cancer-Related Genes Expression Located in 8q24.3 Loci and Comparison with HSF1 Related Expression per Tissue.**

Left panel displays the HSF1 RNA expression in function of 8q24.3 copy number. Box plots for each graph of each gene described in **appendix 4** show the median values at the centred lines; box limits indicate the 25<sup>th</sup> and 75<sup>th</sup> percentiles; whiskers extend 1.5 times the interquartile range from the 25<sup>th</sup> and 75<sup>th</sup> percentiles. Dashed lines rely medians of each copy number category. N = number of patient in each 8q24.3 copy number alteration category are shown in bar graph in top left panel. Right panel displays the RNA expression of the indicated gene in function of HSF1 RNA expression. Each dot represents a patient data. Linear trends are indicated and linear equations are displayed in the caption box for each gene. RMSE = root-mean-square error, R<sup>2</sup> = determination coefficient.

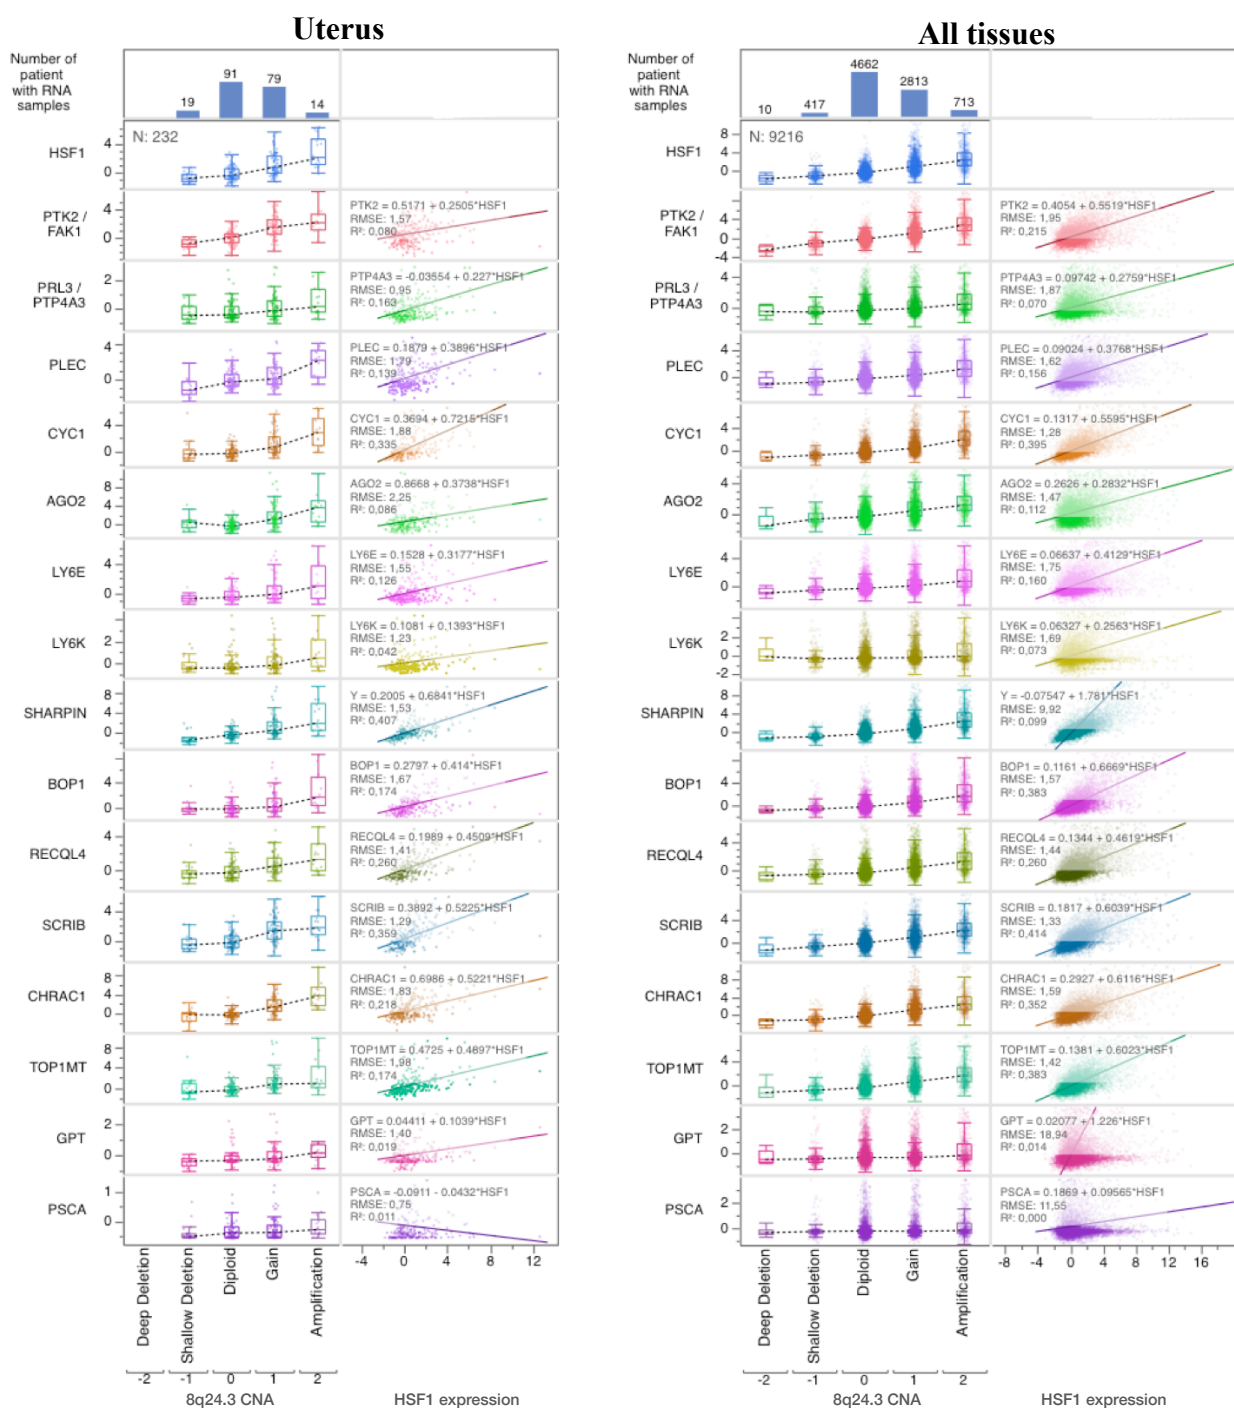

**Appendix 5. Influence of 8q24.3 Copy Number on other Cancer-Related Genes Expression Located in 8q24.3 Loci and Comparison with HSF1 Related Expression per Tissue.**

Left panel displays the HSF1 RNA expression in function of 8q24.3 copy number. Box plots for each graph of each gene described in **appendix 4** show the median values at the centred lines; box limits indicate the 25<sup>th</sup> and 75<sup>th</sup> percentiles; whiskers extend 1.5 times the interquartile range from the 25<sup>th</sup> and 75<sup>th</sup> percentiles. Dashed lines rely medians of each copy number category. N = number of patient in each 8q24.3 copy number alteration category are shown in bar graph in top left panel. Right panel displays the RNA expression of the indicated gene in function of HSF1 RNA expression. Each dot represents a patient data. Linear trends are indicated and linear equations are displayed in the caption box for each gene. RMSE = root-mean-square error, R<sup>2</sup> = determination coefficient.



## Supplemental appendix 6

Brusselaers et al.

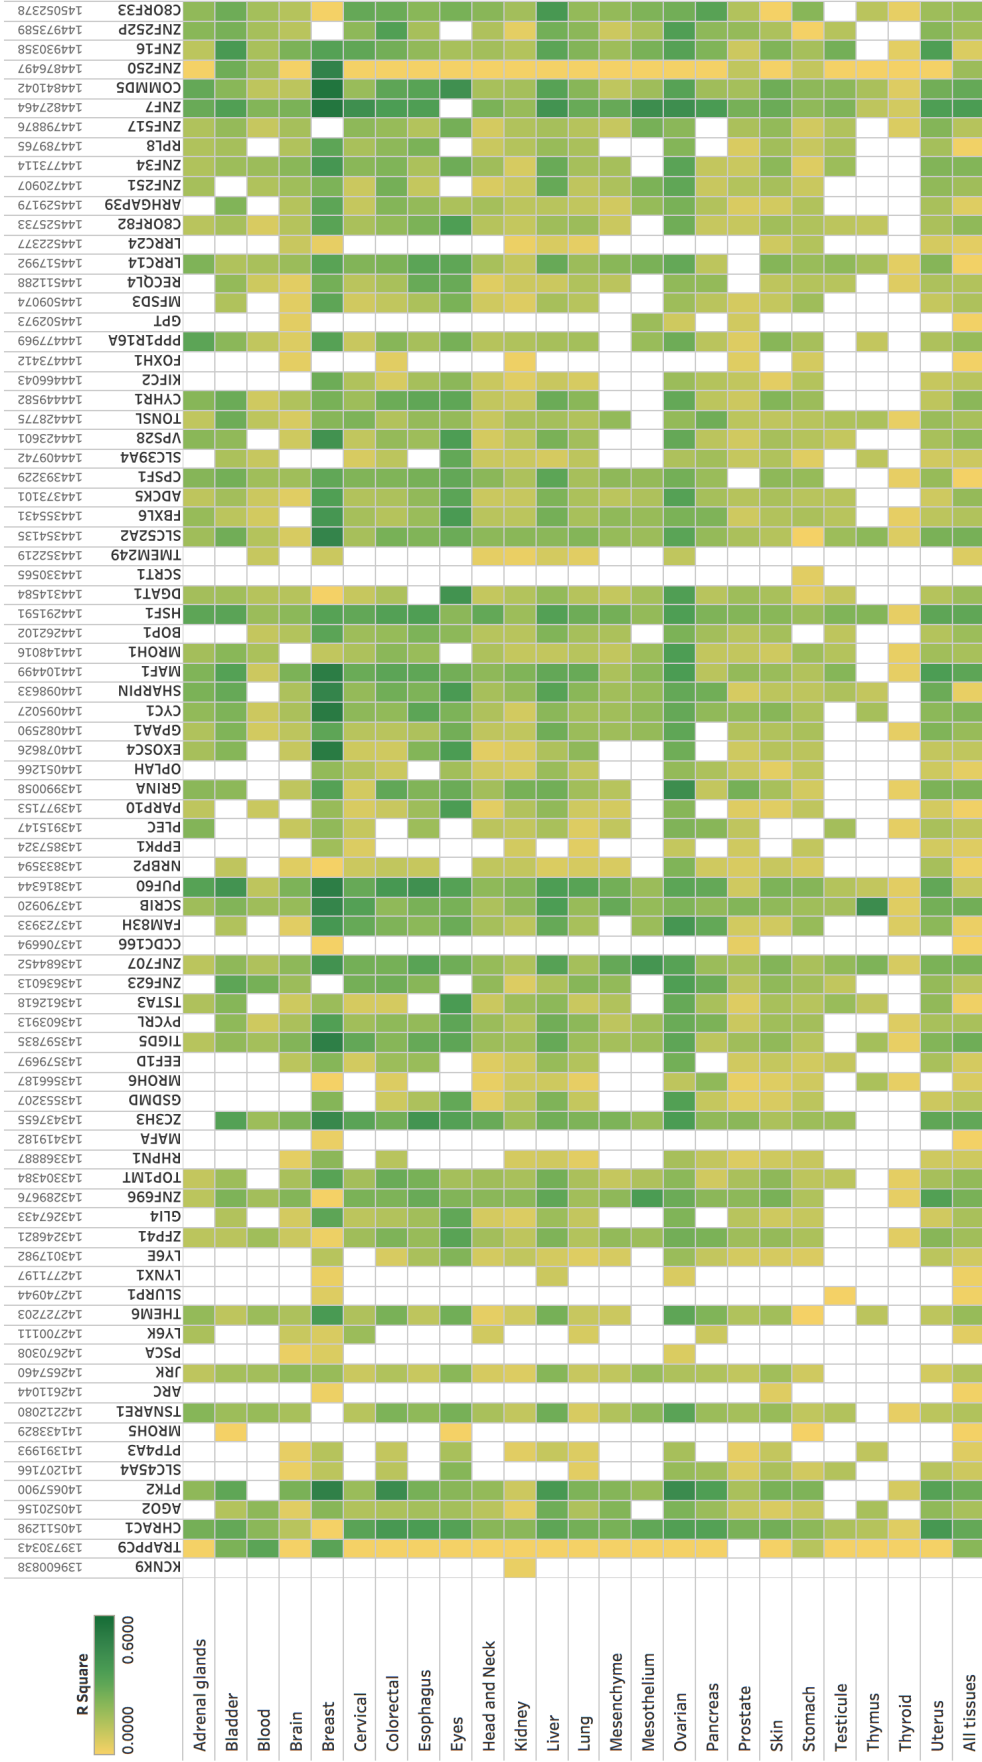

**Appendix 6. Simple linear regressions of predicted 8q24.3 CNA compared to the expression of genes located in 8q24.3 per tissue.** The heatmap presents simple linear regressions of predicted 8q24.3 CNA (non-heterogenous) compared to the expression of genes located in 8q24.3. The heat map shows genes only located in 8q24.3 with FDR/corrected P-value (Benjamini–Hochberg false discovery rate method) below 0.001. Color legend indicates the calculated R-squared (Explained variation / Total variation). R-square values close to 0 indicates that the gene expression is not correlated with 8q24.3 CNA. R-square values close to 1 indicates that the gene expression is correlated with 8q24.3. Blank squares in the table indicate no available or non-significant data (i.e. FDR p-value >0.001). Values above gene name indicate the start coordinate of the gene in chromosome 8.
